# Supplementary material for: Nickel-catalyzed Tishchenko reaction via hetero-nickelacycles by oxidative cyclization of aldehydes with nickel(0) complex
Source: Royal Society of Chemistry journal article supplement (doi:10.1039/b926866a), 2010-01-01

## Nickel-catalyzed Tishchenko Reaction via Hetero-nickelacycles by Oxidative Cyclization of Aldehydes with Nickel(0) Complex

Sensuke Ogoshi,\* Yoichi Hoshimoto and Masato Ohashi

*Department of Applied Chemistry, Faculty of Engineering, Osaka University, Suita,*

*Osaka-565-0871, Japan.*

ogoshi@chem.eng.osaka-u.ac.jp

### Supporting Information

#### [General]

All manipulations were conducted under a nitrogen atmosphere using standard Schlenk or dry box techniques.  $^1\text{H}$ ,  $^{31}\text{P}$ , and  $^{13}\text{C}$  nuclear magnetic resonance spectra were recorded on JEOL GSX-270S, JEOL AL-400, Bruker DPX 400, Bruker AVANCE 400 and Varian UNITY INOVA 600 spectrometers at 25 °C unless otherwise stated. The chemical shifts in  $^1\text{H}$  nuclear magnetic resonance spectra were recorded relative to  $\text{Me}_4\text{Si}$  or residual protiated solvent ( $\text{C}_6\text{D}_5\text{H}$  ( $\delta$  7.16) or  $\text{C}_7\text{D}_7\text{H}$  ( $\delta$  7.02 or 7.13)). The chemical shifts in the  $^{13}\text{C}$  spectra were recorded relative to  $\text{Me}_4\text{Si}$ . Assignment of the resonances in  $^1\text{H}$  and  $^{13}\text{C}$  NMR spectra was based on  $^1\text{H}$ - $^1\text{H}$  COSY, HMQC, and HMBC experiments. High resolution mass spectrometer (HRMS) and elemental analyses were performed at Instrumental Analysis Center, Faculty of Engineering, Osaka University. X-ray crystal data were collected by a Rigaku RAXIS-RAPID Imaging Plate diffractometer.

#### [Materials]

Toluene,  $\text{C}_6\text{D}_6$ , and toluene- $d_8$  were distilled from sodium benzophenone ketyl. All commercially available reagents were distilled and degassed prior to use. IPr (1,3-bis-(2,6-diisopropylphenyl)imidazol-2-ylidene), IPrCl (1,3-bis-(2,6-diisopropylphenyl)-4,5-dichloroimidazol-2-ylidene) and 2-naphthaldehyde- $d_1$  were furnished by known procedures.<sup>1,2</sup>

[NMR-scale experiments (Table 1)]

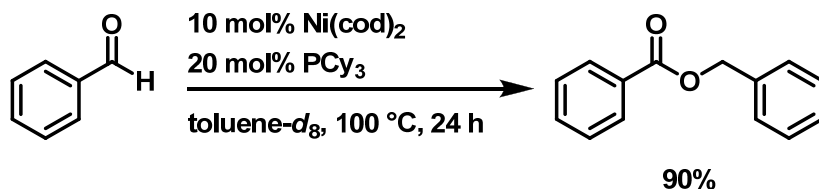

To a solution of Ni(cod)<sub>2</sub> (5.5 mg, 0.020 mmol) and PCy<sub>3</sub> (11.2 mg, 0.040 mmol) in 0.50 mL of toluene-*d*<sub>8</sub> was added benzaldehyde (20.4 mg, 0.20 mmol) at 23 °C. The reaction mixture was heated at 100 °C for 24 h. The solution changed from red to orange. The reaction was monitored by <sup>1</sup>H and <sup>31</sup>P NMR. Benzyl benzoate and **C1** (<sup>31</sup>P NMR: δ 41.7) were generated as red crystals (100% conversion vs Ni). Anal Calcd for C<sub>72</sub>H<sub>132</sub>NiOP (**C1**): C, 60.88; H, 9.38. Found: C, 61.34; H, 8.66.

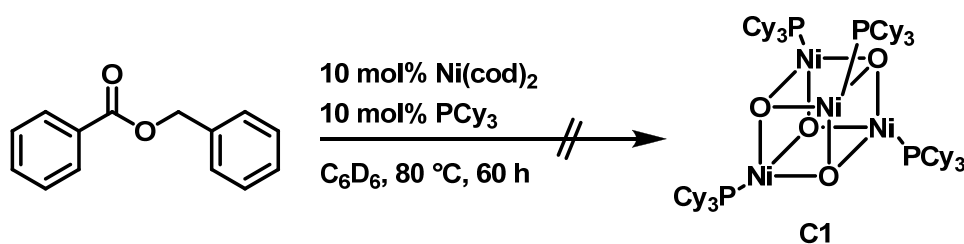

To a solution of Ni(cod)<sub>2</sub> (5.5 mg, 0.020 mmol) and PCy<sub>3</sub> (5.6 mg, 0.020 mmol) in 0.50 mL of C<sub>6</sub>D<sub>6</sub> was added benzyl benzoate (42.4 mg, 0.20 mmol) at 23 °C. The reaction mixture was heated at 80 °C for 60 h. The reaction was monitored by <sup>1</sup>H and <sup>31</sup>P NMR. **C1** (<sup>31</sup>P NMR: δ 41.7) was not formed at all, but unidentified new peaks were observed in <sup>1</sup>H and <sup>31</sup>P NMR spectra of the crude reaction mixture

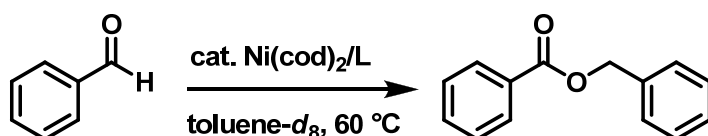

| L     | cat. (mol%) | Time (h) | Yield |
|-------|-------------|----------|-------|
| IPr   | 2           | 6        | >99   |
| IPrCl | 2           | 1.5      | >99   |
| .     | 1           | 3        | >99   |

To a solution of Ni(cod)<sub>2</sub> (11.0 mg, 0.040 mmol) and Ligand (0.040 mmol; IPr 15.5 mg or IPrCl 18.3 mg) in 0.50 mL of toluene-*d*<sub>8</sub> was added benzaldehyde (212.4 mg, 2.0 mmol or 414.8 mg, 4.0 mmol) at 23 °C. The reaction mixture was heated at 60 °C. The reaction was monitored by <sup>1</sup>H NMR. Benzyl benzoate was obtained quantitatively.

**[General experimental procedures of Ni(0)/IPrCl-catalyzed Tishchenko reaction (Table 2)]**

To a solution of Ni(cod)<sub>2</sub> (11.0 mg, 0.040 mmol) and IPrCl (18.3 mg, 0.040 mmol) in 2 mL of toluene was added the aldehyde under inert atmosphere at 23 °C. The reaction mixture was heated at 60 °C or 80 °C for 1–24 h. The reaction was monitored by GC analysis. GC yields were determined using pentadecane as an internal standard. The product was isolated by a silica gel chromatography (eluted with EtOAc, unless otherwise noted). Spectroscopic data of the products (1, 6, 7, 8, 9, 10, 12, 13 and 14) were identical to that previously reported.<sup>3</sup>

**[Spectroscopic data for prepared esters]**

**Benzyl benzoate (1):**

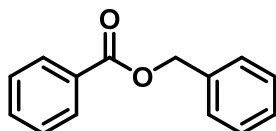

The general procedure was followed with benzaldehyde (429.0 mg, 4.04 mmol) and reaction mixture was stirred at 60 °C for 3 h. Purification by column chromatography gave **1** (429.5 mg, 2.02 mmol, > 99%) as pale yellow oil.

**2,4-Dimethylbenzyl 2,4-dimethylbenzoate (2):**

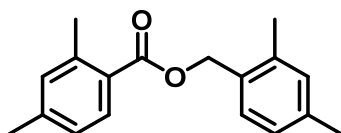

The general procedure was followed with 2,4-dimethylbenzaldehyde (536.4 mg, 4.00 mmol) and reaction mixture was stirred at 60 °C for 3 h. Purification by column chromatography gave **2** (532.8 mg, 1.99 mmol, > 99%) as colorless oil. **<sup>1</sup>H NMR** (400 MHz, CDCl<sub>3</sub>): δ 7.85 (d, J = 8.0 Hz, 1H, ArH), 7.31 (d, J = 8.0 Hz, 1H, ArH), 7.04 (m, 4H, ArH), 5.31 (s, 2H, OCH<sub>2</sub>Ar), 2.59 (s, 3H, CH<sub>3</sub>), 2.39 (s, 3H, CH<sub>3</sub>), 2.35 (s, 3H, CH<sub>3</sub>), 2.34 (s, 3H, CH<sub>3</sub>). **<sup>13</sup>C NMR** (100 MHz, CDCl<sub>3</sub>): δ 167.5, 142.7, 140.7, 138.4, 137.1, 132.7, 131.4, 131.3, 131.1, 129.7, 126.8, 126.7, 126.6, 64.8, 22.0, 21.5, 21.2, 19.1. **HRMS**: Calcd. for C<sub>18</sub>H<sub>20</sub>O<sub>2</sub> 268.1463, Found 268.1465.

**3,5-Dimethylbenzyl 3,5-dimethylbenzoate (3):**

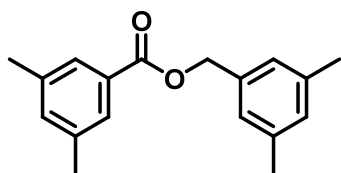

The general procedure was followed with 3,5-dimethylbenzaldehyde (542.8 mg, 4.05 mmol) and reaction mixture was stirred at 60 °C for 3 h. Purification by column chromatography gave **3** (531.5 mg, 1.98 mmol, > 99%) as colorless oil. **<sup>1</sup>H NMR** (400 MHz, CDCl<sub>3</sub>): δ 7.75 (s, 2H, ArH), 7.22 (s, 1H, ArH), 7.11 (s, 2H, ArH), 7.02 (s, 1H, ArH), 5.33 (s, 2H, OCH<sub>2</sub>Ar), 2.39 (s, 6H, CH<sub>3</sub>), 2.38 (s, 6H, CH<sub>3</sub>). **<sup>13</sup>C NMR** (100 MHz, CDCl<sub>3</sub>): δ 166.9, 138.2, 138.0, 136.1, 134.7, 130.2, 130.0, 127.5, 126.2, 66.8, 21.3, 21.2. **HRMS**: Calcd. for C<sub>18</sub>H<sub>20</sub>O<sub>2</sub> 268.1463, Found 268.1458.

#### 2,4,6-Trimethylbenzyl 2,4,6-trimethylbenzoate (**4**):

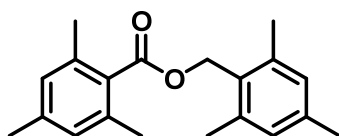

The general procedure was followed with 2,4,6-trimethylbenzaldehyde (202.1 mg, 1.36 mmol) and reaction mixture was stirred at 60 °C for 24 h. Purification by column chromatography gave **4** (170.3 mg, 0.57 mmol, 84%) as yellow oil. **<sup>1</sup>H NMR** (400 MHz, CDCl<sub>3</sub>): δ 6.88 (s, 2H, ArH), 6.82 (s, 2H, ArH), 5.40 (s, 2H, OCH<sub>2</sub>Ar), 2.40 (s, 6H, CH<sub>3</sub>), 2.27 (s, 6H, CH<sub>3</sub>), 2.26 (s, 6H, CH<sub>3</sub>). **<sup>13</sup>C NMR** (100 MHz, CDCl<sub>3</sub>): δ 170.4, 139.1, 138.5, 138.2, 134.9, 131.3, 129.1, 128.8, 128.3, 61.4, 21.1, 21.0, 19.7, 19.6. **HRMS**: Calcd. for C<sub>20</sub>H<sub>24</sub>O<sub>2</sub> 296.1776, Found 296.1774.

#### 3,5-Di-tert-butylbenzyl 3,5-di-tert-butylbenzoate (**5**):

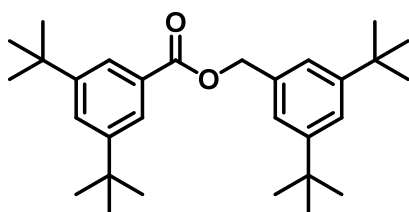

The general procedure was followed with 3,5-di-tert-butylbenzaldehyde (439.1 mg, 2.01 mmol) and reaction mixture was stirred at 80 °C for 2 h. Purification by column chromatography gave **5** (441.2 mg, 2.01 mmol, > 99%) as yellow oil. **<sup>1</sup>H NMR** (400 MHz, CDCl<sub>3</sub>): δ 8.22 (s, 2H, ArH), 7.85 (s, 1H, ArH), 7.62 (s, 1H, ArH), 7.55 (s, 2H, ArH), 5.63 (s, 2H, OCH<sub>2</sub>Ar), 1.55 (s, 36H, CH<sub>3</sub>). **<sup>13</sup>C NMR** (100 MHz, CDCl<sub>3</sub>): δ 167.0, 151.0, 150.9, 135.7, 129.9, 127.1, 124.0, 122.0, 121.9, 67.0, 34.9, 34.8, 31.6, 31.5. **HRMS**: Calcd. for C<sub>30</sub>H<sub>44</sub>O<sub>2</sub> 436.3341, Found 436.3344.

#### 4-Methoxybenzyl 4-methoxybenzoate (**6**):

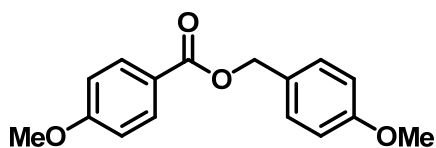

The general procedure was followed with 4-methoxybenzaldehyde (274.3 mg, 2.01 mmol) and reaction mixture was stirred at 60 °C for 2 h. Purification by column chromatography gave **6** (260.8 mg, 1.92 mmol, 95%) as yellow oil.

#### 4-(Trifluoromethyl)benzyl 4-(trifluoromethyl)benzoate (**7**):

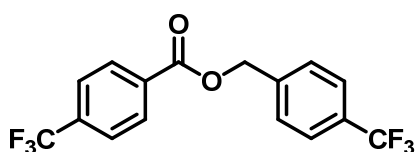

The general procedure was followed with 4-trifluoromethylbenzaldehyde (69.8 mg, 0.40 mmol) and reaction mixture was stirred at 60 °C for 4 h. Purification by column chromatography gave **7** (61.4 mg, 0.18 mmol, 88% as crude yield). Further purification by recrystallization gave **7** (57.2 mg, 0.17 mmol, 82%) as colorless solid.

#### 4-(Methoxycarbonyl)benzyl methyl terephthalate (**8**):

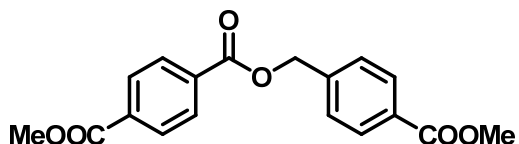

The general procedure was followed with 4-methoxycarbonylbenzaldehyde (329.6 mg, 2.01 mmol) and reaction mixture was stirred at 80 °C for 4 h. Purification by column chromatography gave **8** (324.7 mg, 0.99 mmol, 99%). Further purification by recrystallization gave **8** as colorless solid.

#### Naphthalen-2-ylmethyl 2-naphthoate (**9**):

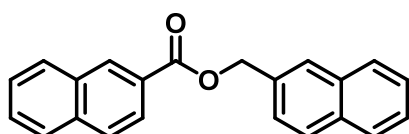

The general procedure was followed with 2-naphthadehyde (208.6 mg, 1.34 mmol) and reaction mixture was stirred at 60 °C for 3 h. Purification by column chromatography gave **9** (195.8 mg, 0.63

mmol, 94% as crude yield). Further purification by recrystallization gave **8** (170.8 mg, 0.55 mmol, 82%) as colorless solid. NMR scale experiment was conducted followed by procedure noted in p S12.

**Furfuryl furoate (10):**

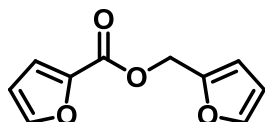

The general procedure was followed with furfural (192.2 mg, 2.00 mmol) and reaction mixture was stirred at 60 °C for 3 h. Purification by column chromatography gave **10** (118.6 mg, 0.62 mmol, 62%) as yellow oil. The yellow solid was produced as unidentified byproduct.

**3,5,5-Trimethylhexyl 3,5,5-trimethylhexanoate (11):**

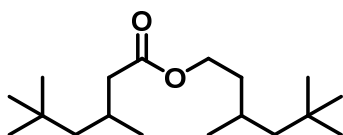

The general procedure was followed with 3,5,5-trimethylhexanal (569.9 mg, 4.01 mmol) and reaction mixture was stirred at 60 °C for 1 h. Purification by column chromatography gave **11** (543.3 mg, 1.91 mmol, 96%) as colorless oil. This product was obtained as a diastereomer mixture **11/11'** (60/40, estimated by  $^1\text{H NMR}$ ).  $^1\text{H NMR}$  (400 MHz,  $\text{CDCl}_3$ ):  $\delta$  4.09–4.05 (m, 2H of **11** and **11'**,  $\text{OCH}_2\text{CH}_2$ ), 2.31–2.29 (m, 1H of **11'**,  $^t\text{BuCH}_2\text{CH}(\text{Me})\text{CH}_2$ ), 2.28–2.26 (m, 1H of **11**,  $^t\text{BuCH}_2\text{CH}(\text{Me})\text{CH}_2$ ), 2.13–2.03 (m, 2H), 1.63–1.59 (m, 2H), 1.44–1.42 (m, 1H), 1.25 (t,  $J = 4.0$  Hz, 2H of **11'**,  $^t\text{BuCH}_2\text{CH}(\text{Me})\text{CH}_2$ ), 1.21 (t,  $J = 4$  Hz, 2H of **11**,  $^t\text{BuCH}_2\text{CH}(\text{Me})\text{CH}_2$ ), 1.13–1.01 (ddd, 2H), 0.97 (d,  $J = 4.0$  Hz, 3H of **11'**, Me- $H$ ), 0.95 (d,  $J = 4.0$  Hz, 3H of **11'**, Me- $H$ ), 0.89 (s, 9H of **11** and **11'**,  $^t\text{Bu-H}$ ), 0.87 (s, 9H of **11** and **11'**,  $^t\text{Bu-H}$ ).  $^{13}\text{C NMR}$  ( $\text{CDCl}_3$ , 67 MHz):  $\delta$  173.4, 62.8, 51.1 (**11'**), 51.1 (**11**), 50.7, 44.3, 38.0, 31.2, 30.2 (**11'**), 30.1 (**11**), 27.1 (**11**), 26.9 (**11'**), 26.3, 22.8 (**11'**), 22.8 (**11**), 22.7 (**11**), 22.6 (**11'**). **HRMS**: Calcd. for  $\text{C}_{18}\text{H}_{36}\text{O}_2$  284.2715, Found 284.2713.

**2-Ethylhexyl 2-ethylhexanoate (12):**

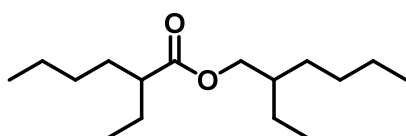

The general procedure was followed with 2-ethylhexanal (519.3 mg, 4.05 mmol) and reaction mixture was stirred at 60 °C for 1 h. Purification by column chromatography gave **12** (483.3 mg, 1.88 mmol, 94%) as colorless oil.

**Cyclohexylmethyl cyclohexanecarboxylate (13):**

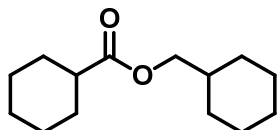

The general procedure was followed with cyclohexanecarbaldehyde (450.2 mg, 4.01 mmol) and reaction mixture was stirred at 60 °C for 1 h. Purification by column chromatography gave **13** (451.5 mg, 2.01 mmol, 99%) as colorless oil.

**Neopentyl pivalate (Scheme 2, Entry 14):**

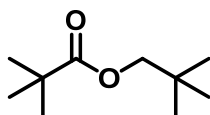

The general procedure was followed with pivalaldehyde (442 uL, 344.8 mg, 4.00 mmol) and reaction mixture was stirred at 60 °C for 1 h. Neopentyl pivalate (**14**) is difficult to isolate because of its low boiling point. Therefore, product yield was determined by GC.

[Mechanistic investigations]

NMR Monitoring of the Tishchenko reaction of 2-naphthaldehyde:

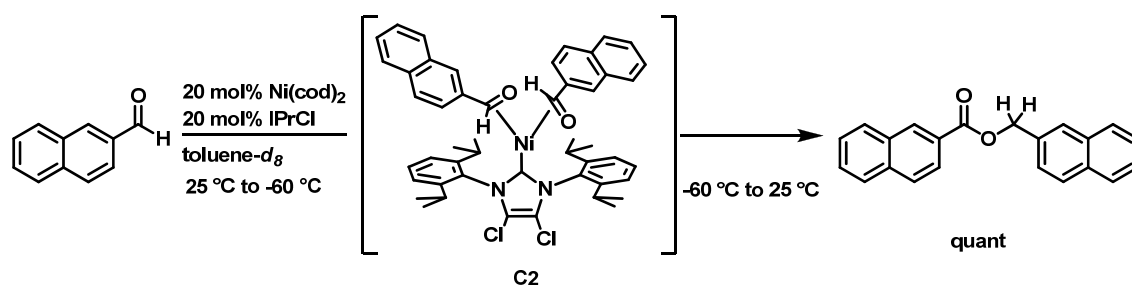

To a solution of Ni(cod)<sub>2</sub> (110.0 mg, 0.40 mmol) and IPrCl (183.2 mg, 0.40 mmol) in 2 mL of toluene-*d*<sub>8</sub> was added 2-naphthaldehyde (312.4 mg, 2.00 mmol) at 23 °C and the sample was transferred to an NMR tube equipped with a sealable teflon cap. The tube was sealed and inserted in a NMR spectrometer. The <sup>1</sup>H NMR analysis was conducted at 25 °C (NMR S1) and then the sample was cooled to -60 °C. After the measurement of <sup>1</sup>H NMR (NMR S2), <sup>13</sup>C NMR (NMR S3) and HMBC (NMR S4) at -60 °C, the sample was allowed to warm to 25 °C. Then, <sup>1</sup>H NMR analysis was conducted at 25 °C again to verify that the reaction is not proceeded from when the first <sup>1</sup>H NMR analysis had been conducted at 25 °C. The reaction at room temperature was monitored by <sup>1</sup>H NMR for 1 d and the 2-naphthaldehyde was consumed to give corresponding ester quantitatively. Spectral data for **C2**: **<sup>1</sup>H NMR** (600 MHz, toluene-*d*<sub>8</sub>, -60 °C): δ 4.70 (brs, 2H, ArCHO), 3.12 (br, 2H, <sup>*i*</sup>Pr-H), 2.97 (br, 2H, <sup>*i*</sup>Pr-H), 1.61 (br, 6H, <sup>*i*</sup>Pr-H), 1.17 (br, 6H, <sup>*i*</sup>Pr-H), 1.07 (br, 6H, <sup>*i*</sup>Pr-H), 1.02 (br, 6H, <sup>*i*</sup>Pr-H). **<sup>13</sup>C NMR** (150 MHz, toluene-*d*<sub>8</sub>): δ 196.0, 109.3, 29.6, 28.8, 24.8, 24.3, 24.0, 23.6..

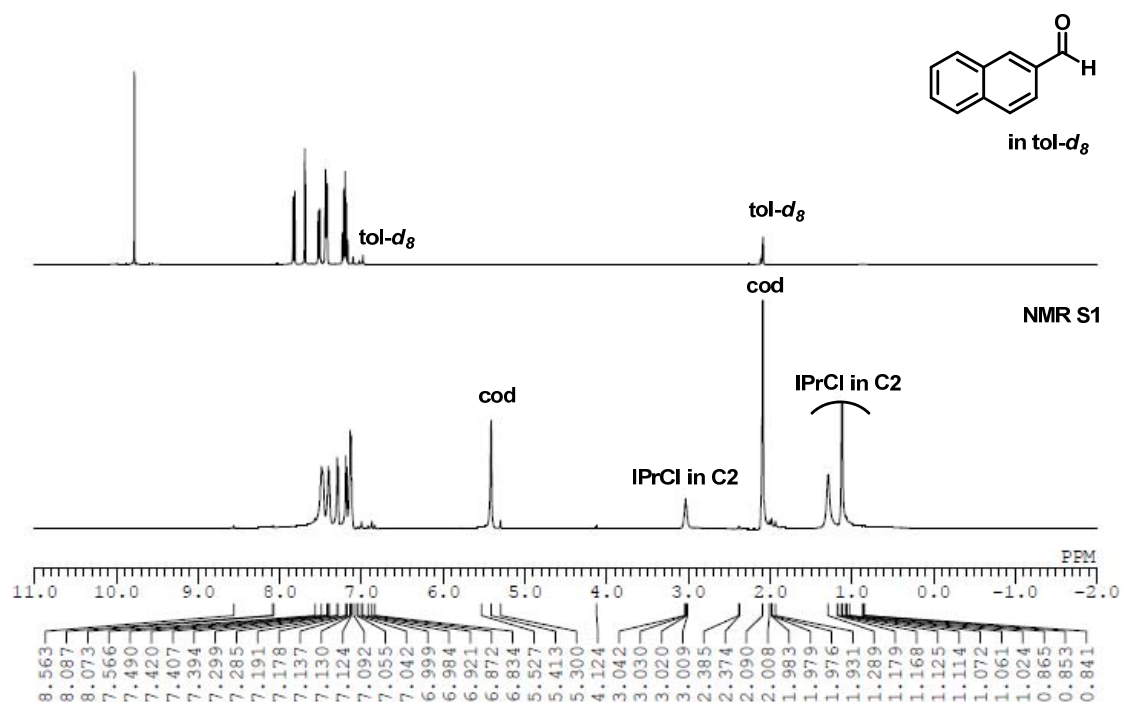



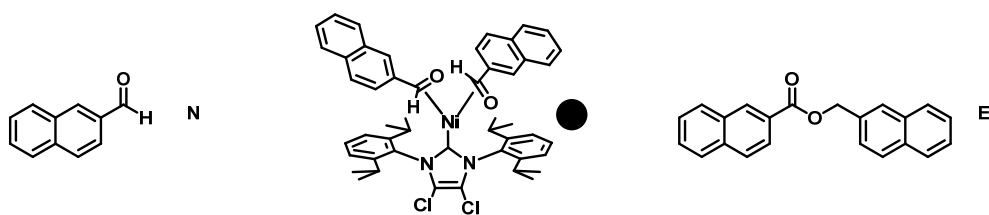

NMR S2

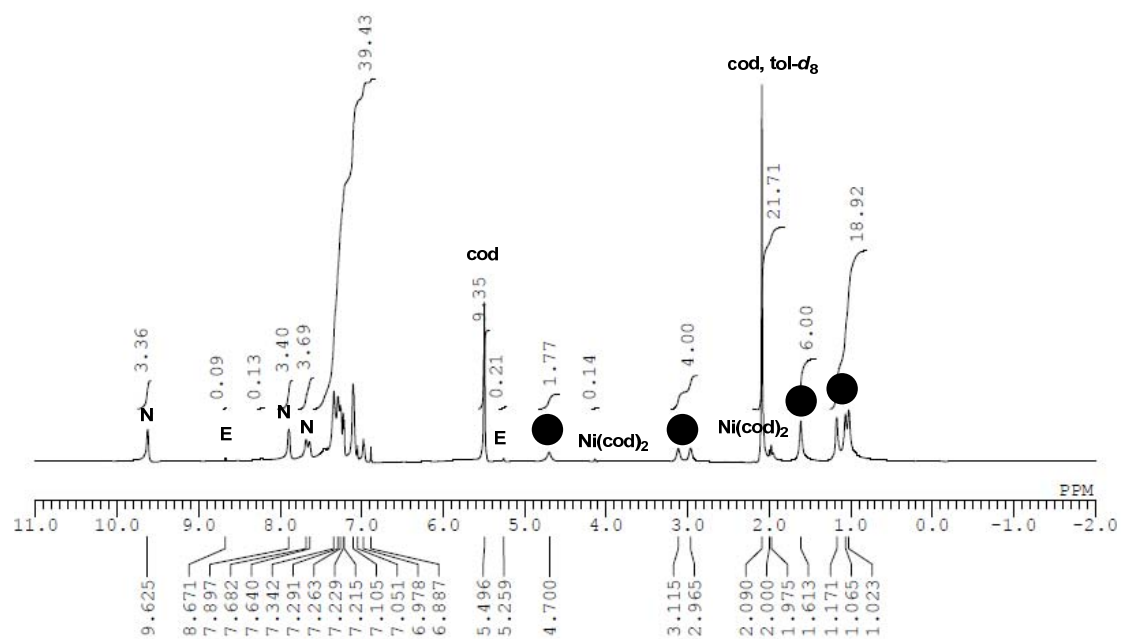

NMR S3

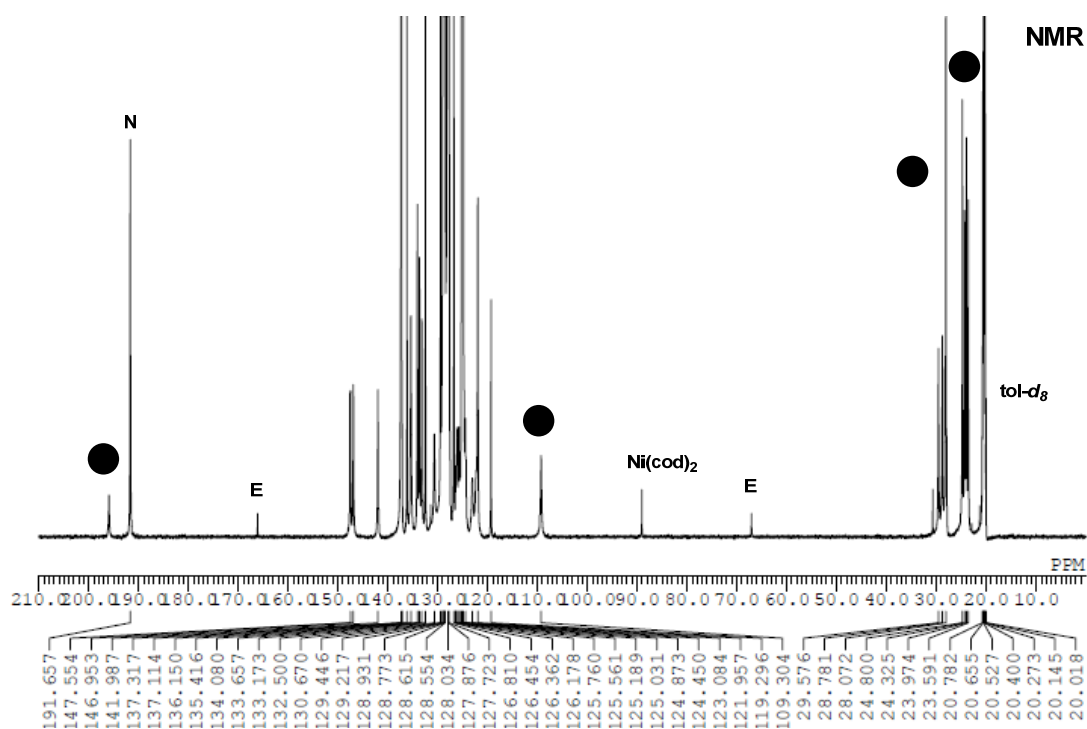

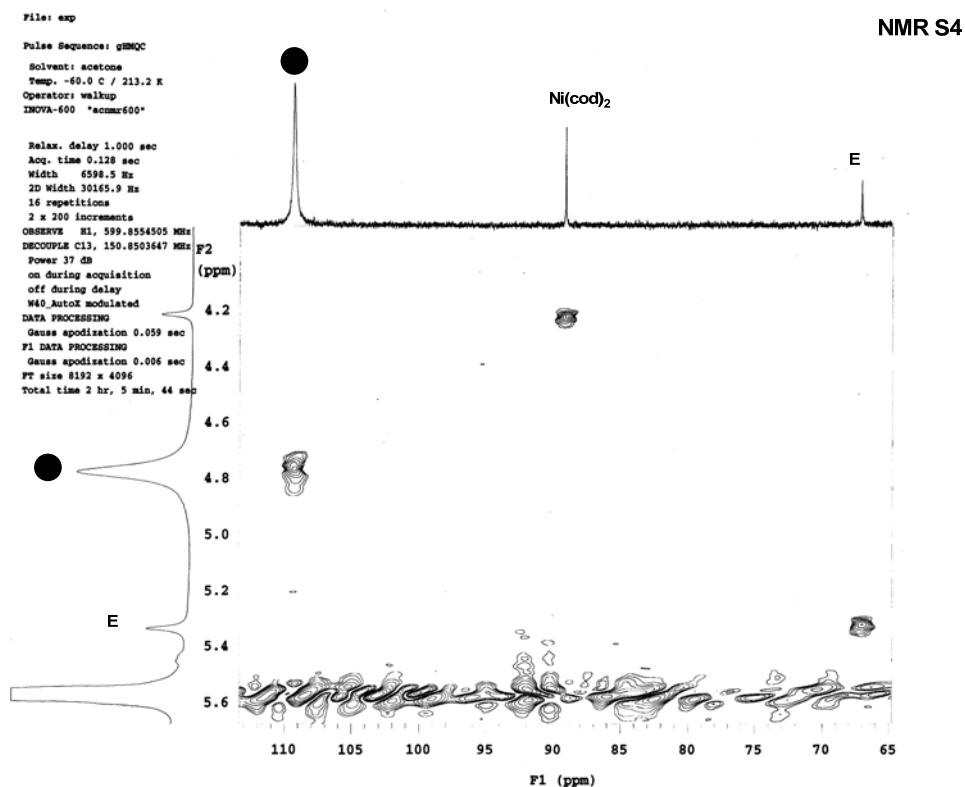

### NMR Monitoring of the Tishchenko reaction of 2-naphthaldehyde- $d_1$ :

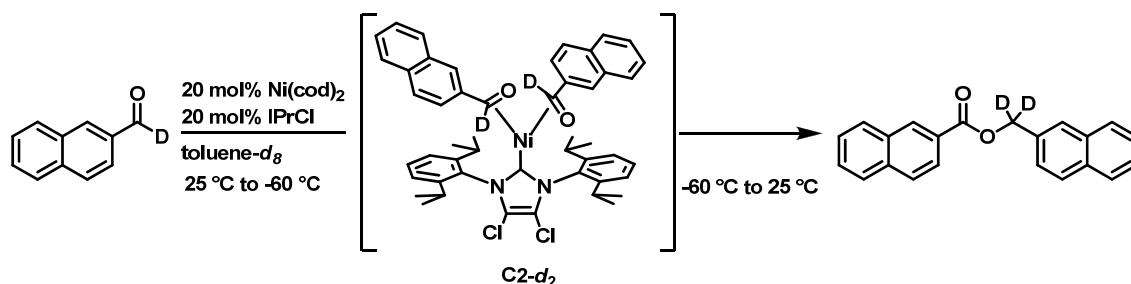

To a solution of Ni(cod)<sub>2</sub> (110.0 mg, 0.40 mmol) and IPrCl (183.2 mg, 0.40 mmol) in 2 mL of toluene-*d*<sub>8</sub> was added 2-naphthaldehyde-*d*<sub>1</sub> (314.4 mg, 2.00 mmol) at 23 °C and the sample was transferred to an NMR tube equipped with a sealable teflon cap. The tube was sealed and inserted in a NMR spectrometer. The <sup>1</sup>H NMR analysis was conducted at 25 °C and then the sample was cooled to -60 °C. After the measurement of <sup>1</sup>H NMR (NMR S5) and <sup>13</sup>C NMR (NMR S6) at -60 °C, the sample was allowed to warm to 25 °C. Then, <sup>1</sup>H NMR analysis was conducted at 25 °C again to verify that the reaction is not proceeded from when the first <sup>1</sup>H NMR analysis had been conducted at 25 °C.

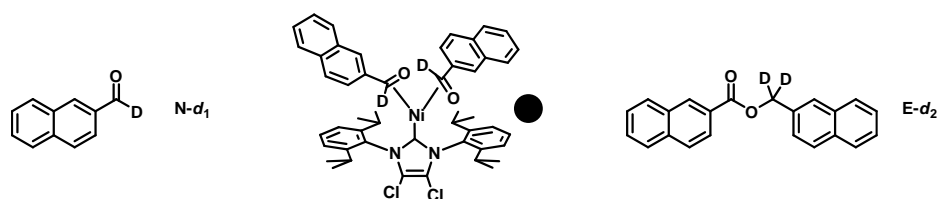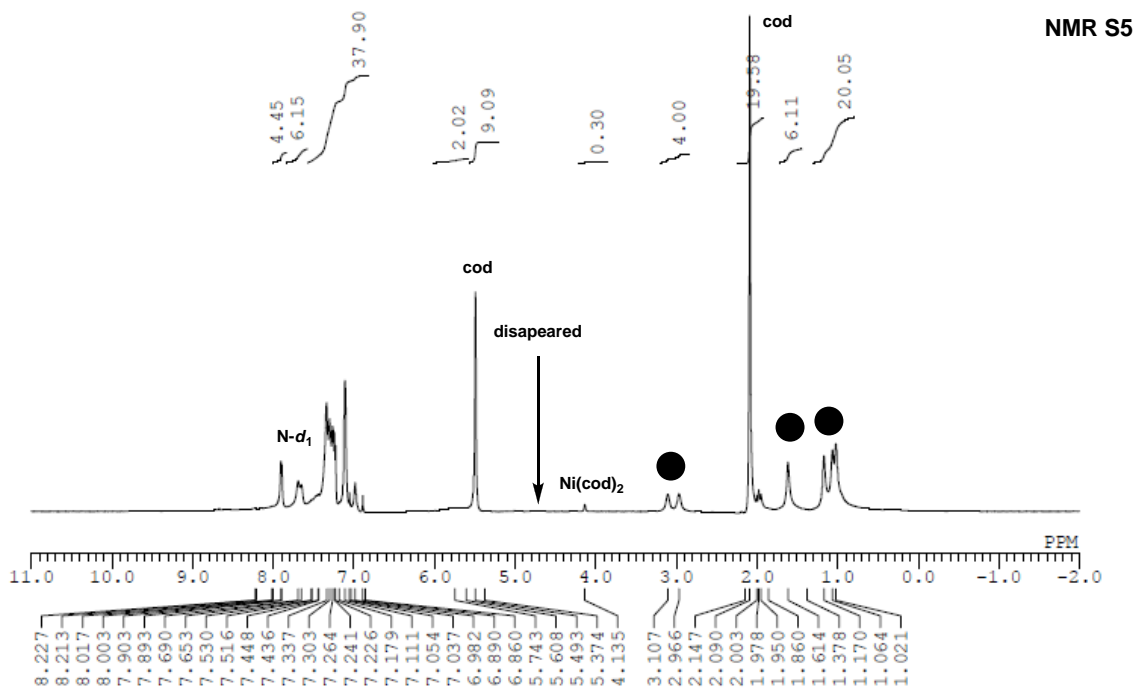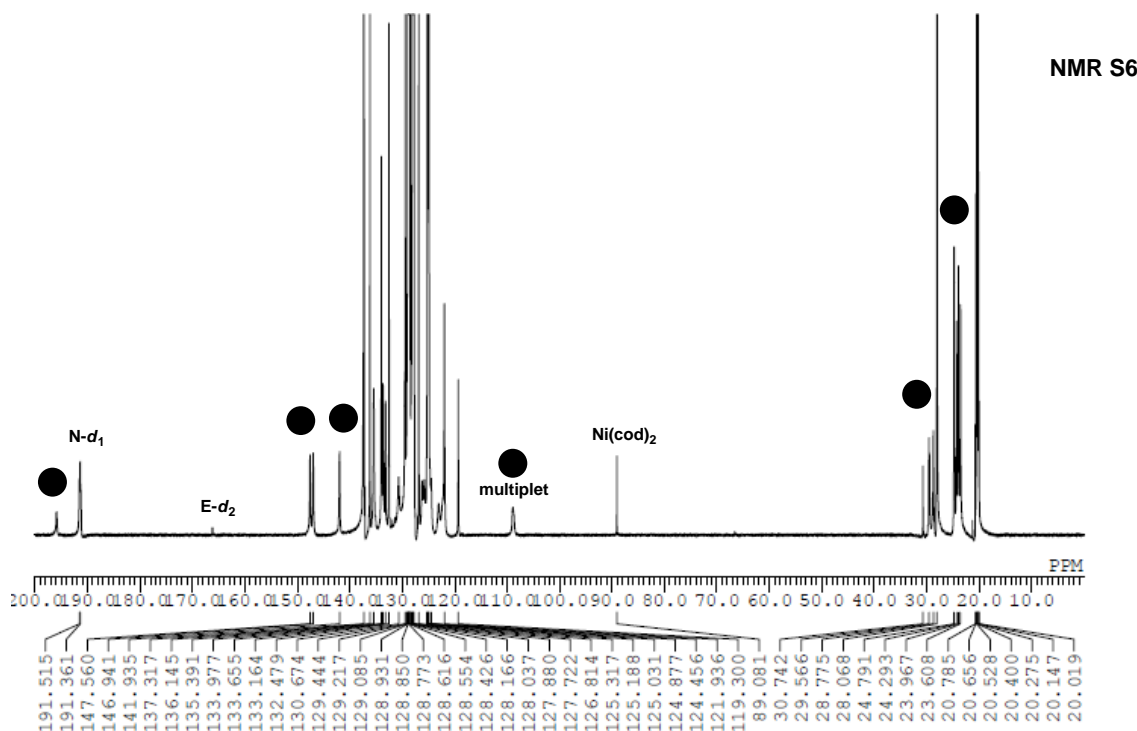

### [Determination of reaction rate constant and KIE]

For all kinetic analyses, each measurement was repeated at least twice.

#### Reaction rate constant of the Tishchenko reaction of 2-naphthaldehyde, $k_H$ :

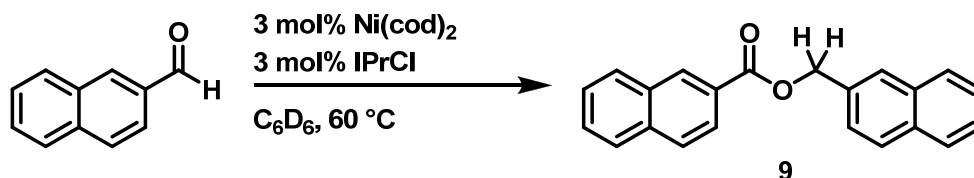

94% NMR yield,  $d[C_{10}H_7CHO]/dt = k_H = 3.55(3) \times 10^{-4} [\text{mol} \cdot \text{m}^{-3} \cdot \text{sec}^{-1}]$

To a solution of  $\text{Ni}(\text{cod})_2$  (11.0 mg, 0.040 mmol) and  $\text{IPrCl}$  (18.3 mg, 0.040 mmol) in 0.5 mL of  $\text{C}_6\text{D}_6$  was added 2-naphthaldehyde (206.2 mg, 1.32 mmol) and 1,4-dioxane (39.5 mg, 0.45 mmol) as an internal standard at 25 °C. The reaction mixture was thermostated at 60 °C, and then the integral values at  $\delta_H$  8.12 ppm and 3.32 ppm, the resonances attributable to the aromatic proton in **9** and to 1,4-dioxane, respectively, were monitored periodically (every 5 minutes) by means of  $^1\text{H}$  NMR spectroscopy (Table S1). The rate constant of disappearance of  $\text{C}_{10}\text{H}_7\text{CHO}$  ( $k_H$ ) was evaluated by least-squares fitting of the conversion-time profiles to a zero-order rate equation (eq. S1).

$$-d[C_{10}H_7CHO]/dt = k_H \quad (\text{S1})$$

where  $[C_{10}H_7CHO] = [C_{10}H_7CHO]_0 - 2[\mathbf{9}]$ ,  $[C_{10}H_7CHO]_0 = 1.169(5) [\text{mol m}^{-3}]$

( $[C_{10}H_7CHO]_0$  means the concentration of  $[C_{10}H_7CHO]$  at  $t = 0$ .)

#### Reaction rate constant of the Tishchenko reaction of 2-naphthaldehyde- $d_1$ , $k_D$ :

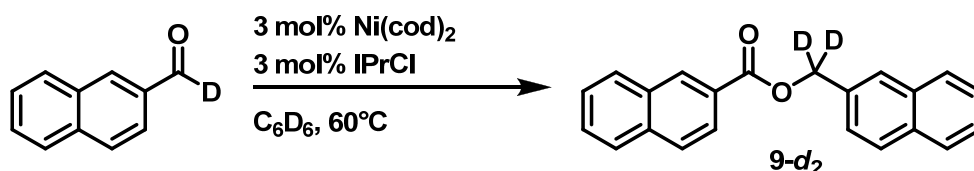

95% NMR yield,  $d[C_{10}H_7CDO]/dt = k_D = 1.87(1) \times 10^{-4} [\text{mol} \cdot \text{m}^{-3} \cdot \text{sec}^{-1}]$

To a solution of  $\text{Ni}(\text{cod})_2$  (11.0 mg, 0.040 mmol) and  $\text{IPrCl}$  (18.3 mg, 0.040 mmol) in 0.5 mL of  $\text{C}_6\text{D}_6$  was added 2-naphthaldehyde- $d_1$  (207.5 mg, 1.32 mmol) and 1,4-dioxane (40.5 mg, 0.46 mmol) as an internal standard at 25 °C. The reaction mixture was thermostated at 60 °C, and then the integral values at  $\delta_H$  8.12 ppm and 3.32 ppm, the resonances attributable to the aromatic proton in **9-d<sub>2</sub>** and to 1,4-dioxane, respectively, were monitored periodically (every 5 minutes) by means of  $^1\text{H}$  NMR spectroscopy (Table S2). The rate constant of disappearance of  $\text{C}_{10}\text{H}_7\text{CDO}$  ( $k_D$ ) was evaluated by least-squares fitting of the conversion-time profiles to a zero-order rate equation (eq. S2).

$$-d[C_{10}H_7CDO]/dt = k_D \quad (\text{S2})$$

where  $[C_{10}H_7CDO] = [C_{10}H_7CDO]_0 - 2[9-d_2]$ ,  $[C_{10}H_7CDO]_0 = 1.180(4)$   $[mol\ m^{-3}]$   
( $[C_{10}H_7CDO]_0$  means the concentration of  $[C_{10}H_7CDO]$  at  $t = 0$ .)

These two experiments show a KIE value of reaction rate ( $k_H/k_D = 3.55 \times 10^{-4}/1.87 \times 10^{-4} = 1.9$ ).

Table S1

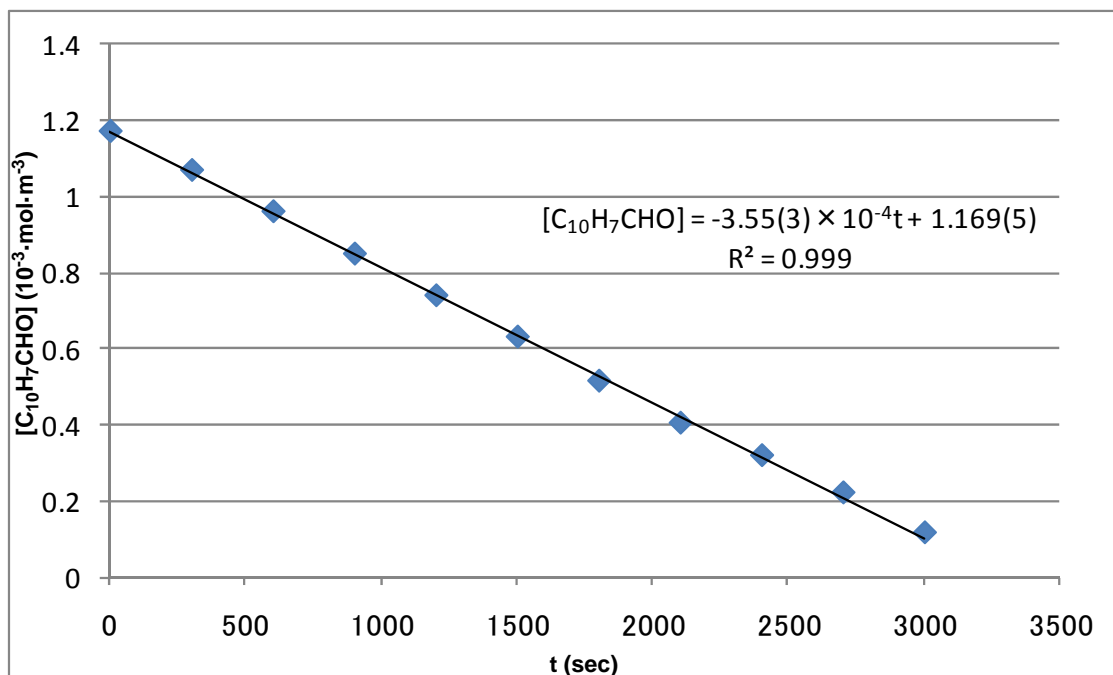

Table S2

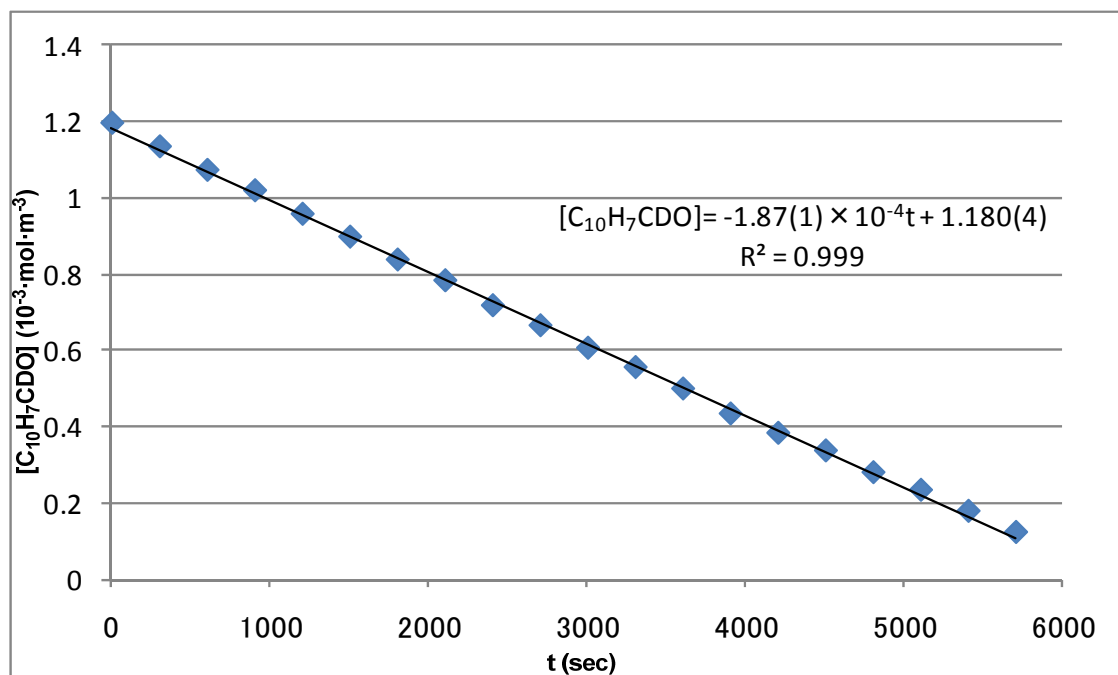

## References

1. A. J. Arduengo, III, R. Krafczyk and R. Schmutzler, *Tetrahedron*, 1999, **55**, 14523.
2. V. P. Senthilnathan and M. S. Platz, *J. Am. Chem. Soc.*, 1981, **103**, 5503.
3. M. R. Crimmin, A. G. M. Barrett, M. S. P. Hill and A. Panayiotis, *Org. Lett.*, 2007, **9**, 331.
4. B. Halton and R. Boese, G. M. Dixon, *Eur. J. Org. Chem.*, 2003, 4507.
5. X. Bei, A. Hagemeyer, A. Volpe, R. Saxton, H. Turner and A. S. Guram, *J. Org. Chem.*, 2004, **69**, 8626-8633.
6. V.V. Grushin and H. Alper, *J. Org. Chem.*, 1991, **56**, 5159.
7. A. Zuyls, P. W. Roesky, G. B. Deacon, K. Konstas and P. C. Junk, *Eur. J. Org. Chem.*, 2008, 693.
8. I. Simpura and V. Nevalainen, *Tetrahedron*, 2001, **57**, 9867.

[NMR spectra of new esters]

Supplementary Material (ESI) for Chemical Communications  
 This journal is (c) The Royal Society of Chemistry 2010

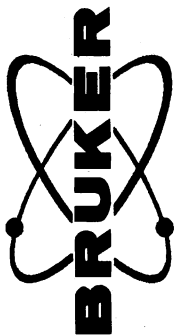

Current Data Parameters  
 NAME hoshimoto  
 EXPNO 77  
 PROCNO 1

F2 - Acquisition Parameters  
 Date\_ 20090529  
 Time\_ 14.03  
 INSTRUM spect  
 PROBHD 5 mm BBO BB-1H  
 PULPROG zg30  
 TD 65536  
 SOLVENT CDCl3  
 NS 16  
 DS 2  
 SWH 8278.146 Hz  
 FIDRES 0.126314 Hz  
 AQ 3.9584243 sec  
 RG 143.7  
 DW 60.400 usec  
 DE 6.00 usec  
 TE 298.2 K  
 D1 1.0000000 sec  
 d11 0.0300000 sec  
 DELTA 0.89999998 sec  
 TD0 1

==== CHANNEL f1 =====  
 NUC1 1H  
 P1 12.00 usec  
 PL1 2.60 dB  
 SFO1 400.1324710 MHz

==== CHANNEL f2 =====  
 CPDPRG2  
 NUC2 off  
 PCPD2 100.00 usec  
 PL2 120.00 dB  
 PL12 120.00 dB  
 PL13 120.00 dB  
 SFO2 400.1324710 MHz

F2 - Processing parameters  
 SI 32768  
 SF 400.1300106 MHz  
 WDW EM  
 SSB 0  
 LB 0.30 Hz  
 GB 0  
 PC 1.00

2.587  
 2.386  
 2.346  
 2.339

5.308

7.864  
 7.844  
 7.318  
 7.299  
 7.257  
 7.051  
 7.016

3.20  
 9.77

2.14

1.00  
 1.01  
 4.16

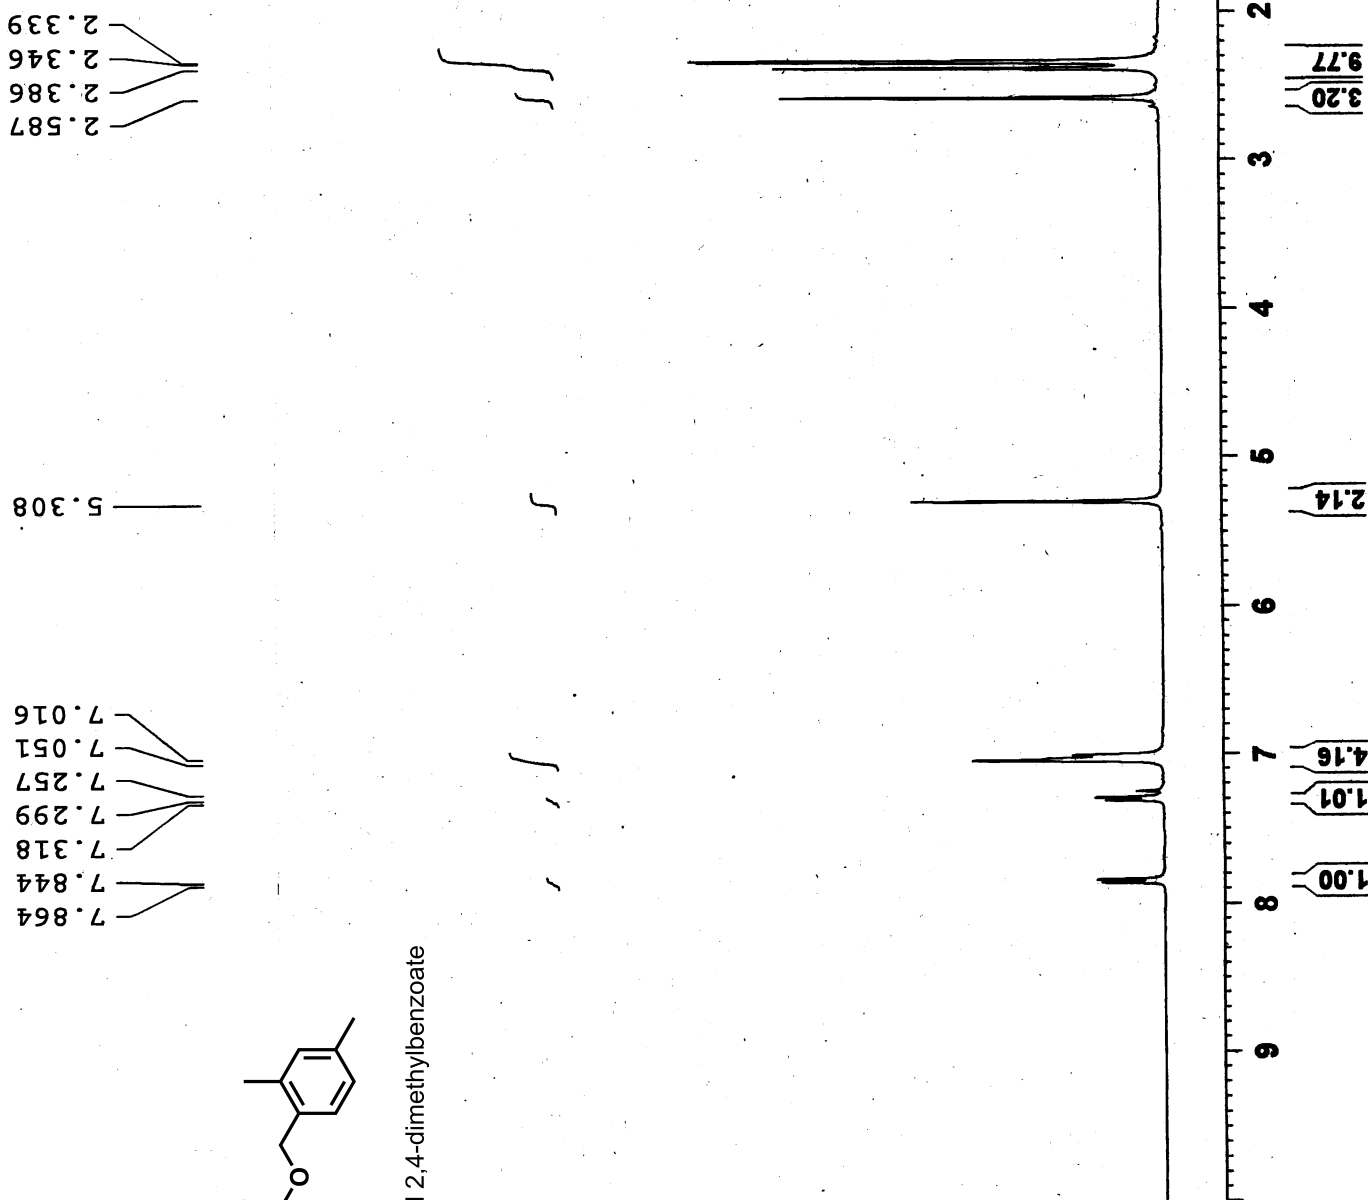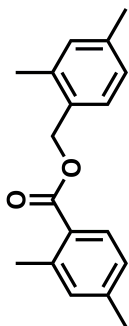

2,4-dimethylbenzyl 2,4-dimethylbenzoate

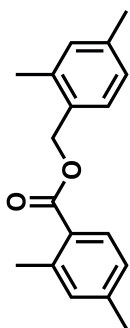

2,4-dimethylbenzyl 2,4-dimethylbenzoate

21.97  
21.50  
21.24  
19.07

64.84

76.85  
77.16  
77.48

142.66  
140.68  
138.39  
137.12  
132.65  
131.37  
131.34  
131.06  
129.69  
126.76  
126.69  
126.55

167.46

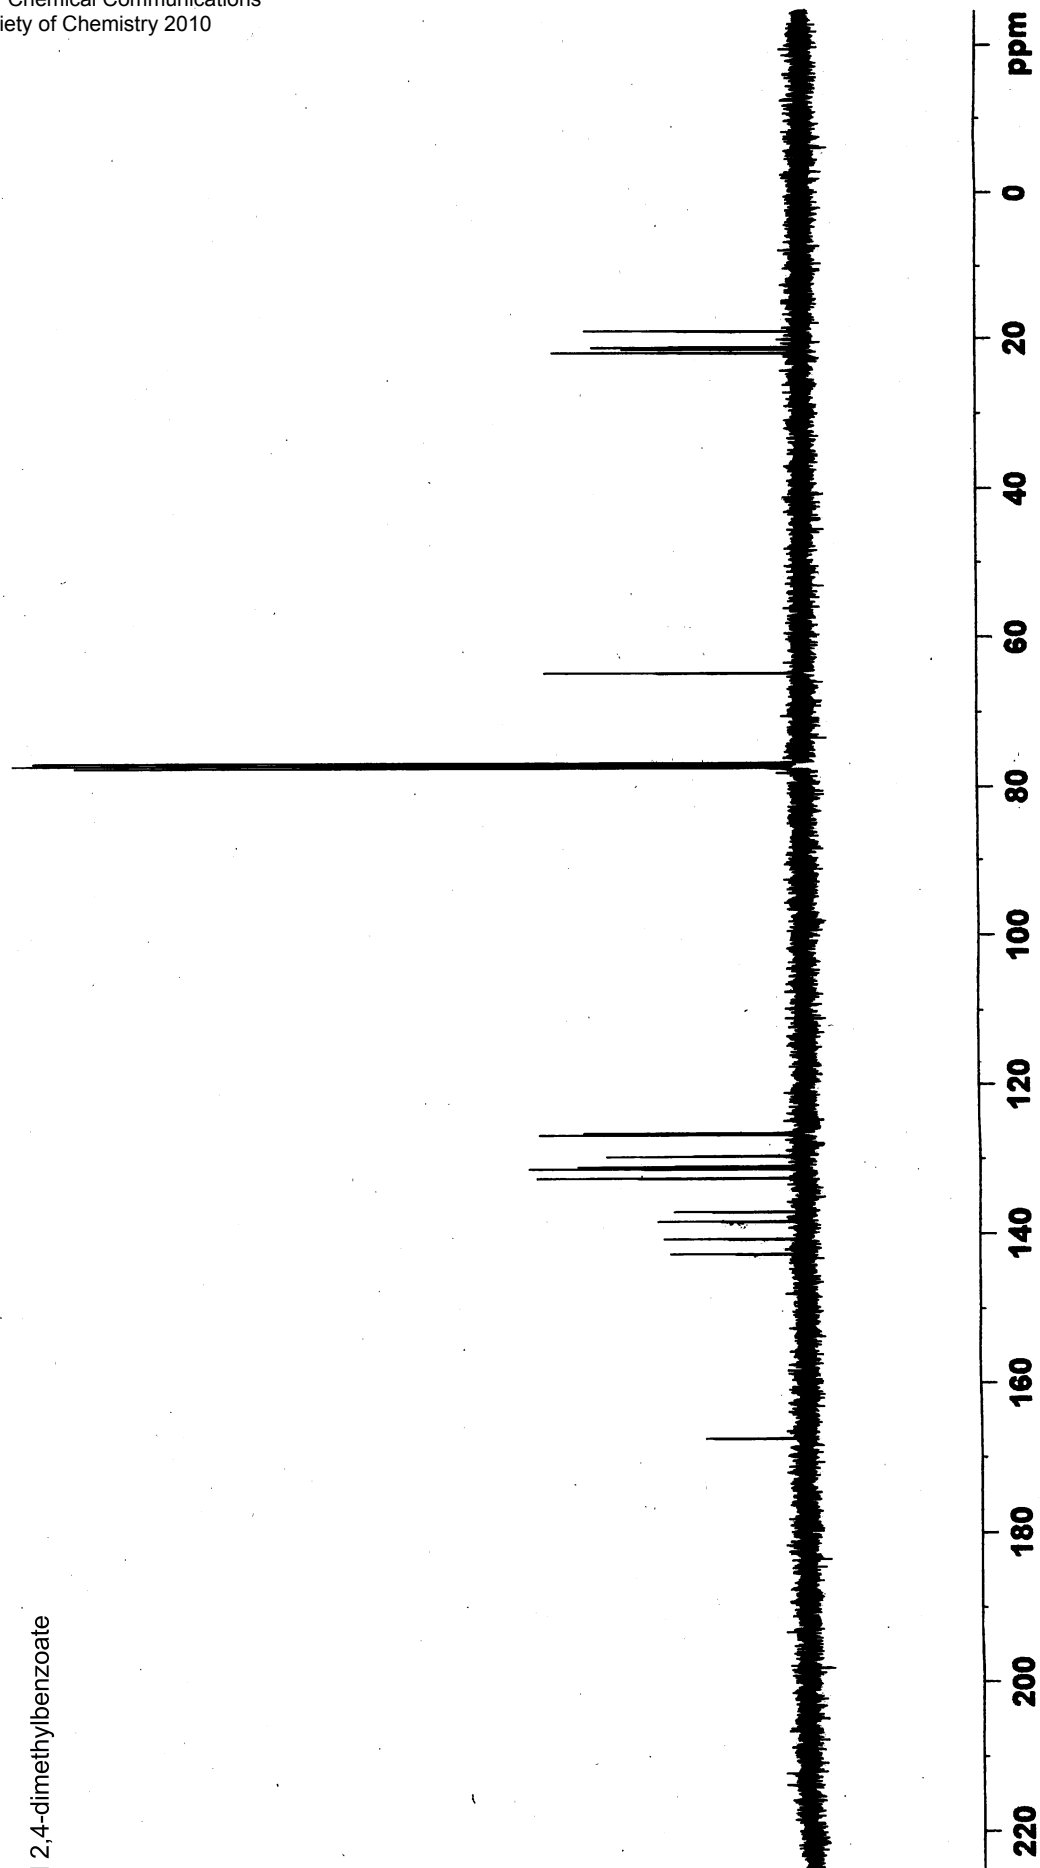



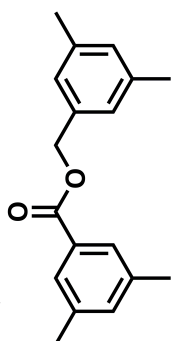

3,5-dimethylbenzyl 3,5-dimethylbenzoate

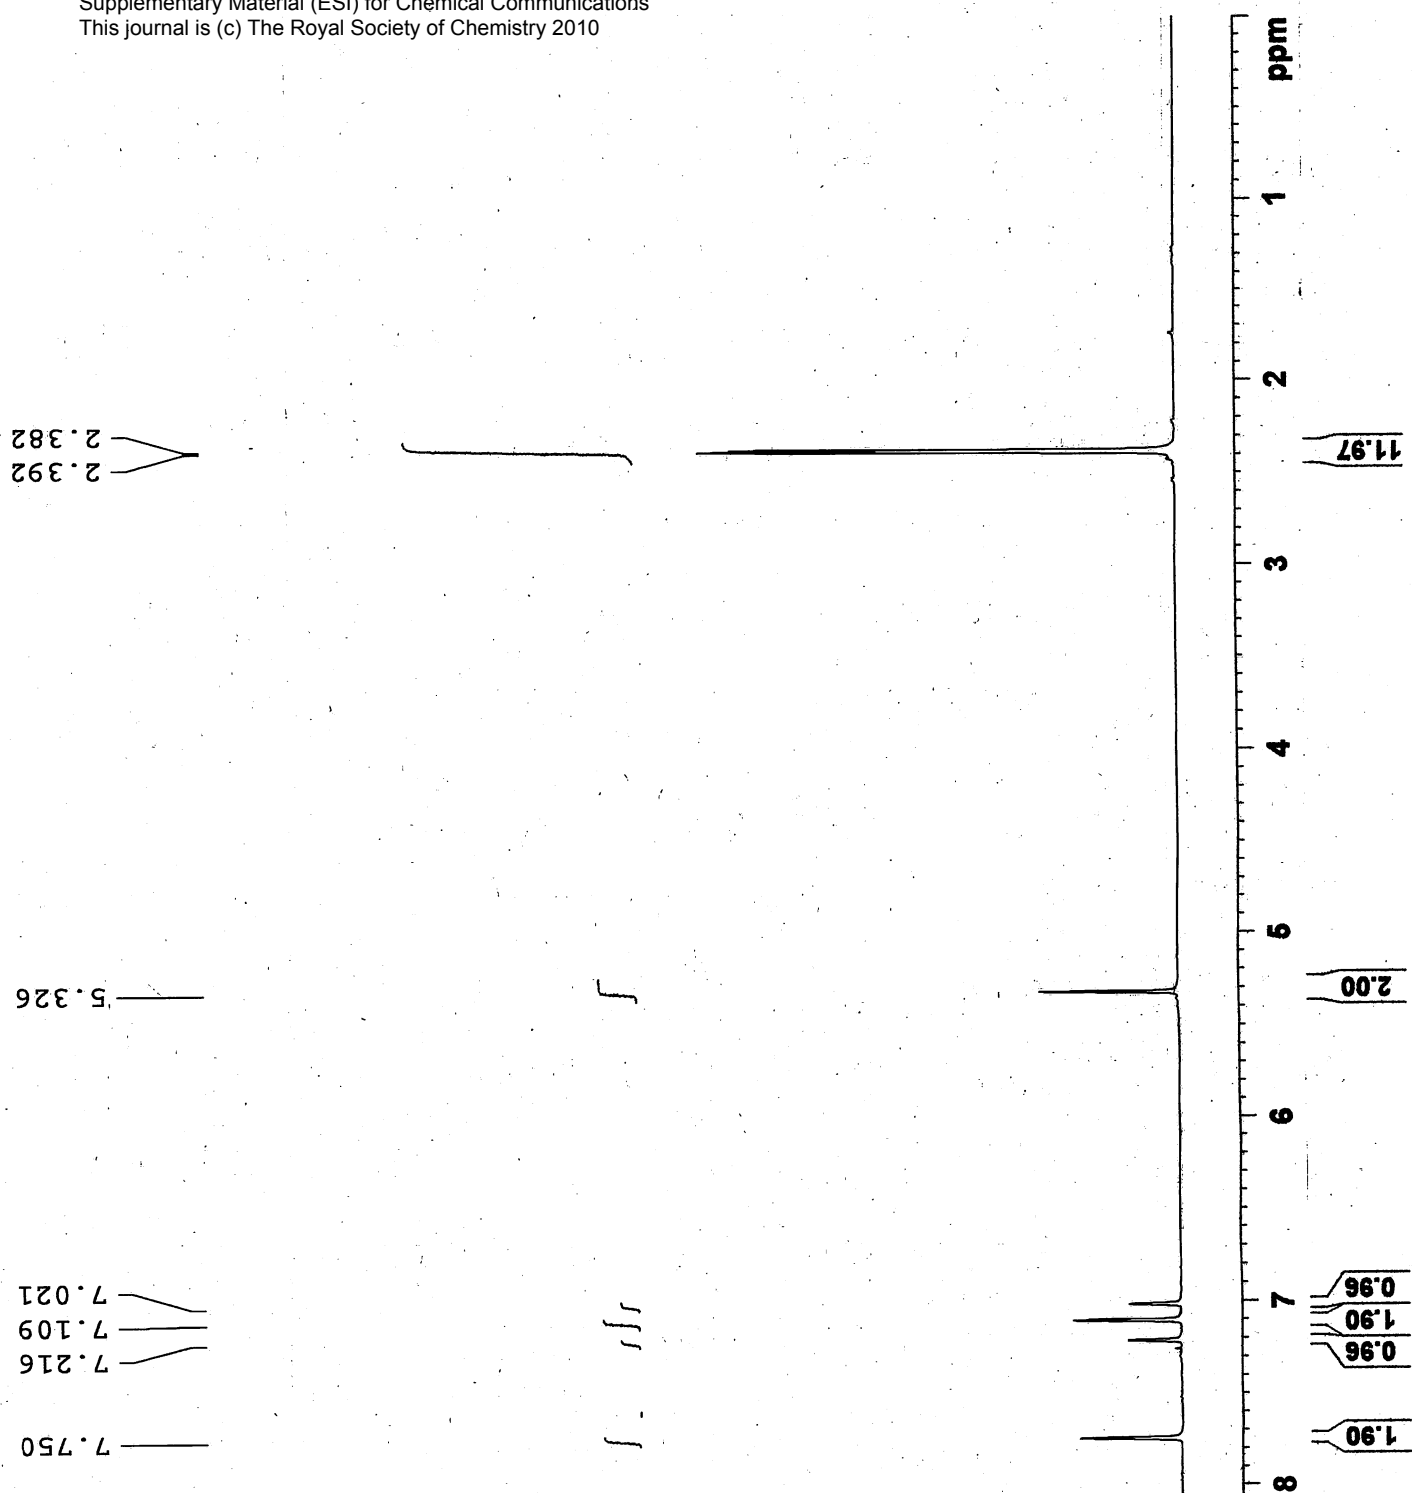

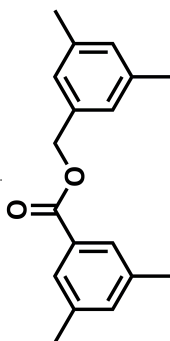

3,5-dimethylbenzyl 3,5-dimethylbenzoate

21.32  
21.19

66.77

76.83  
77.14  
77.46

126.23  
127.50  
129.95  
130.17  
134.69  
136.10  
138.04  
138.22

166.90

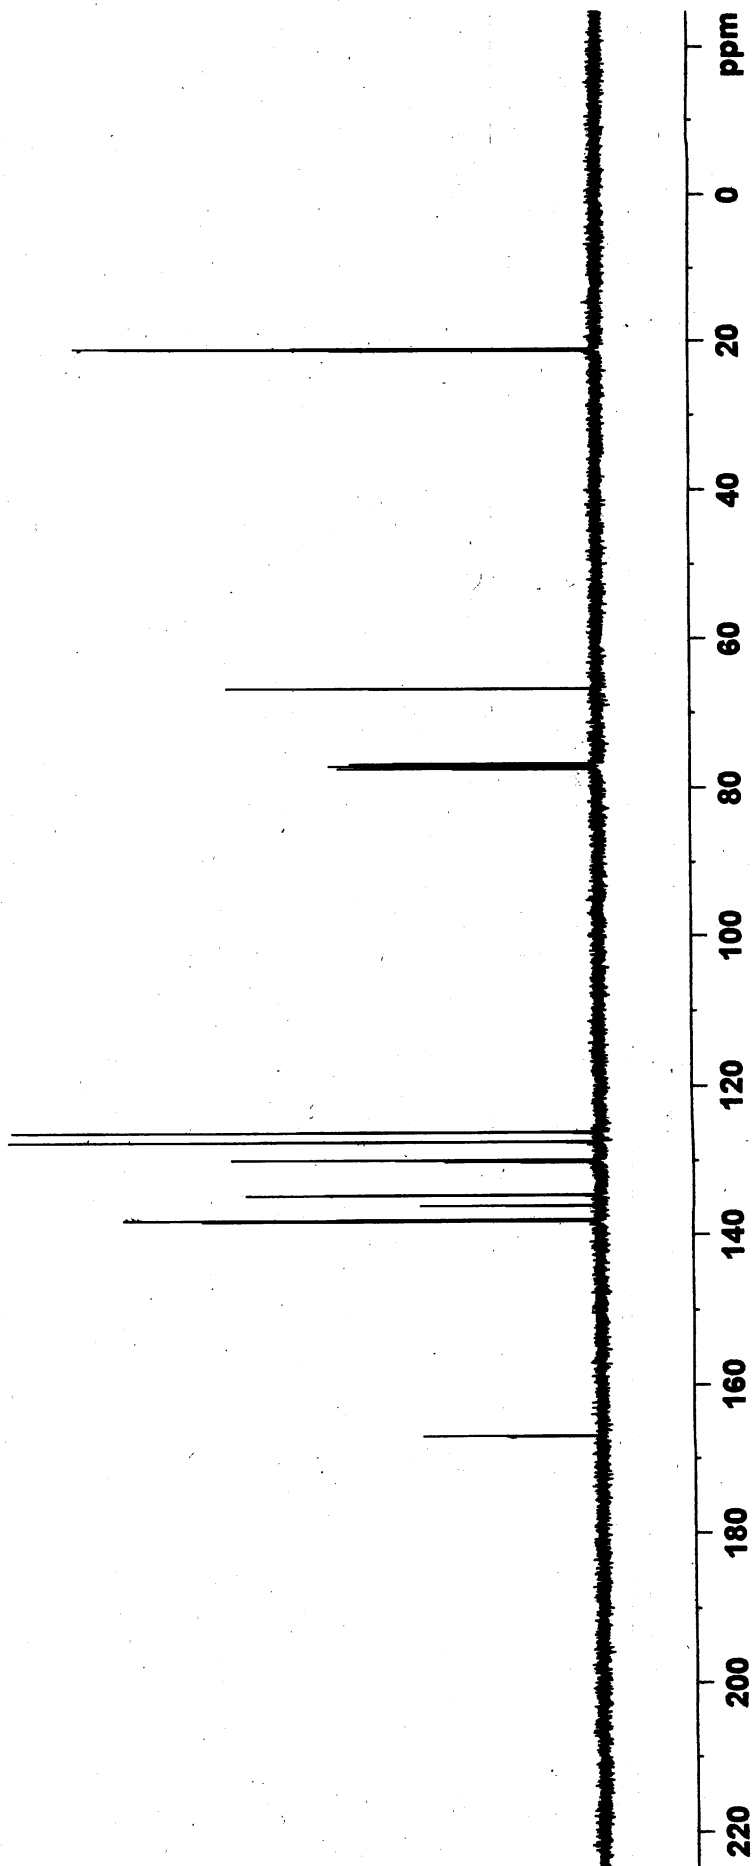

\\HD300G\share\hoshimoto\H-NMR after\R.600-R.699\R.611\1HNMR CD3CL.a1s

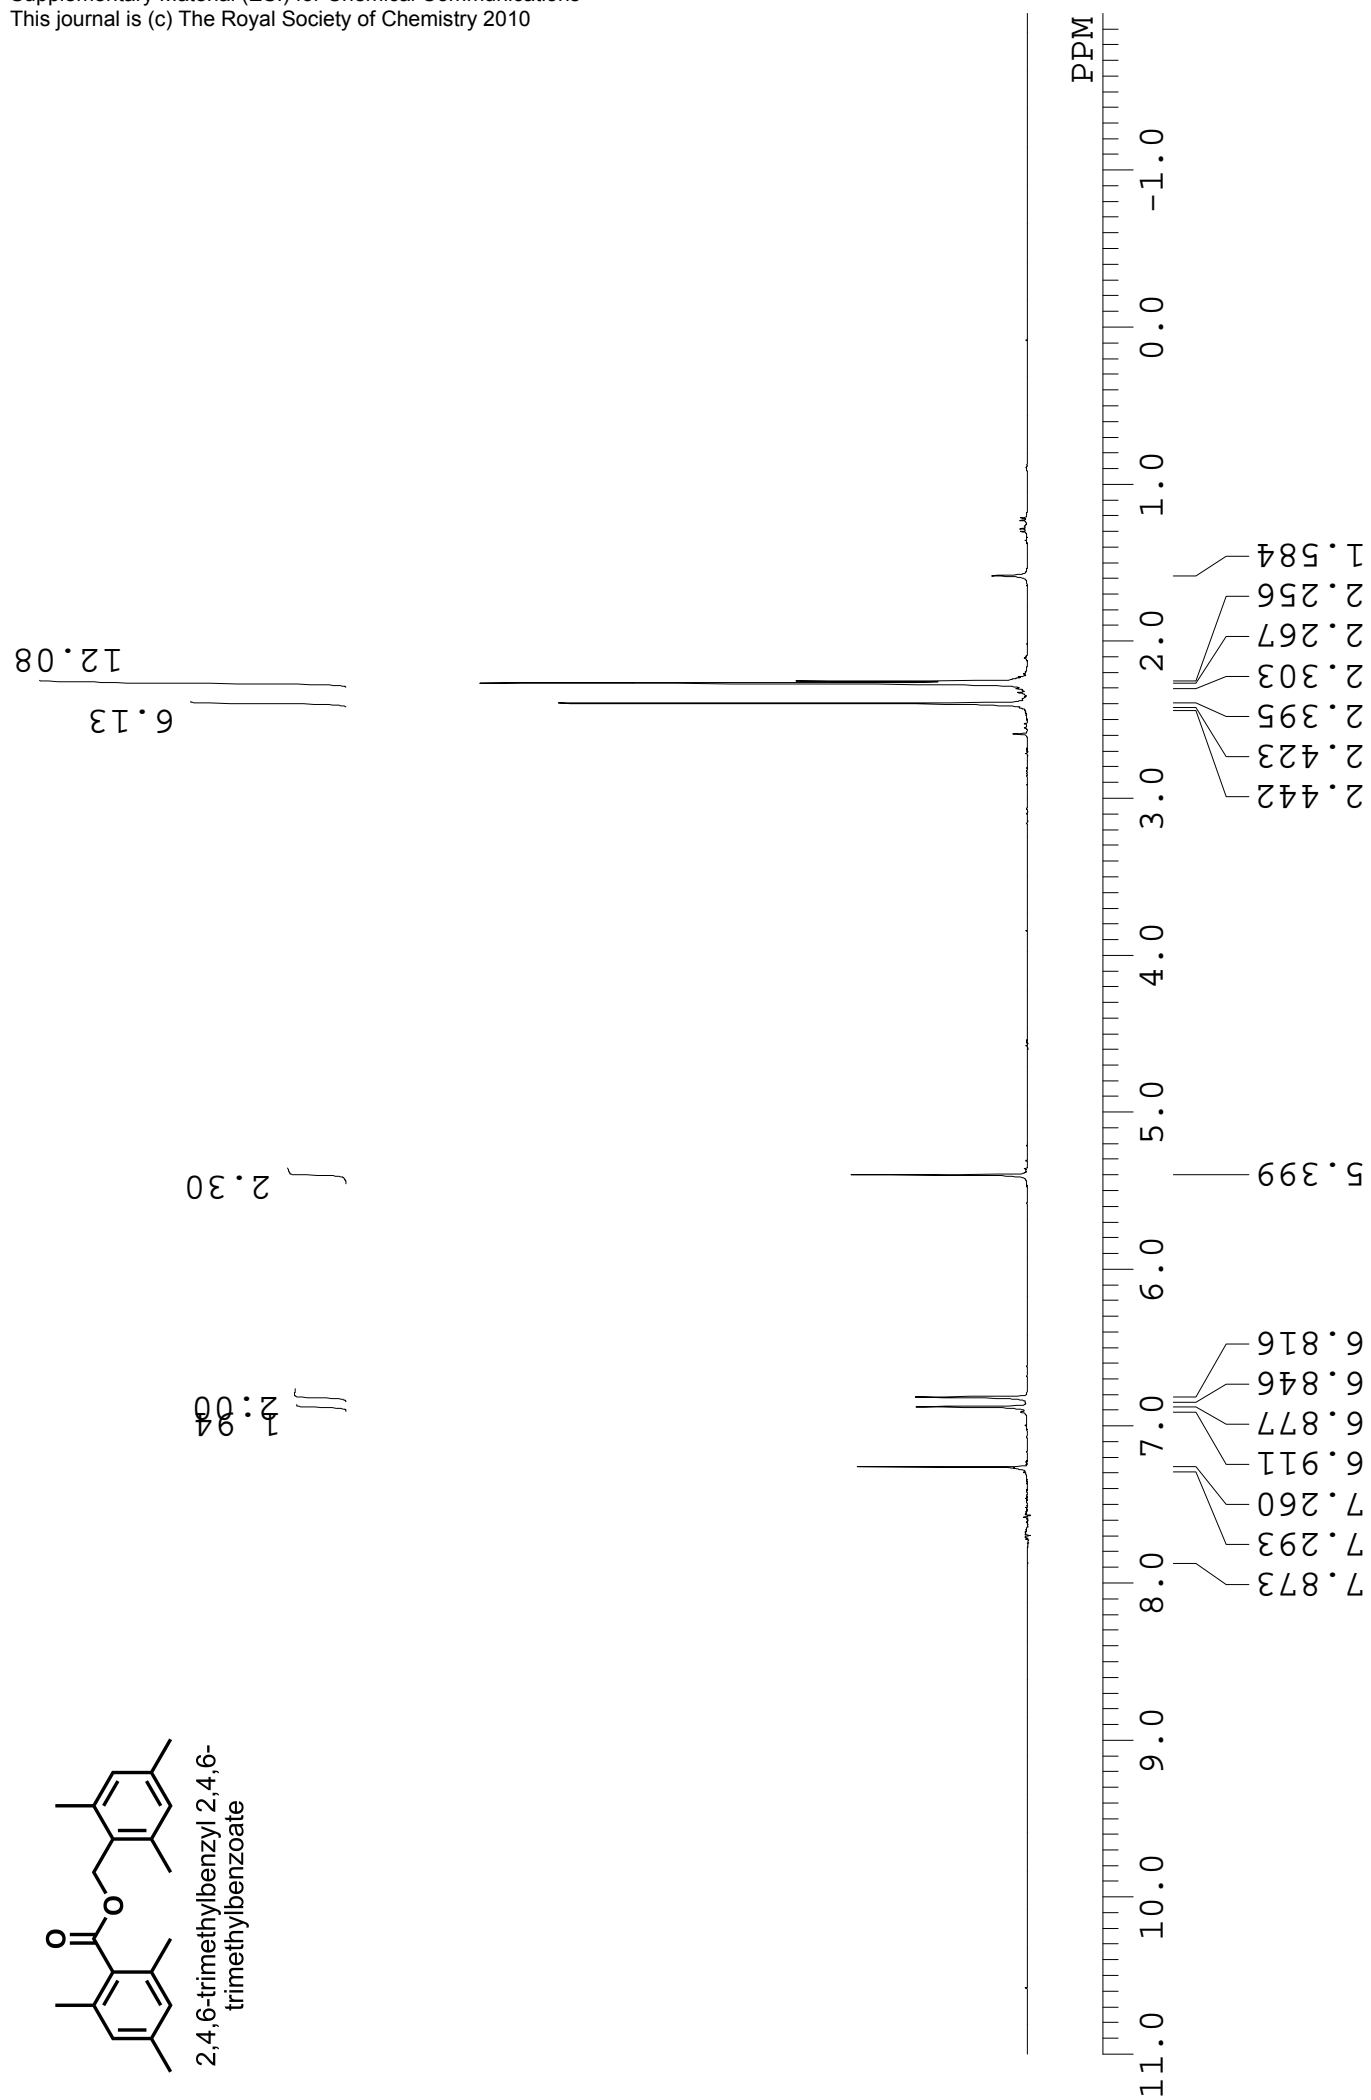

\\HD300G\share\hoshimoto\H-NMR after\R.600-R.699\R.611\13CNMR CD3CL.als

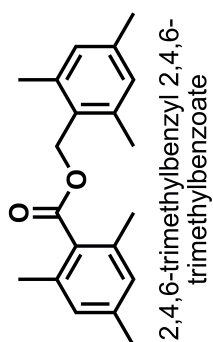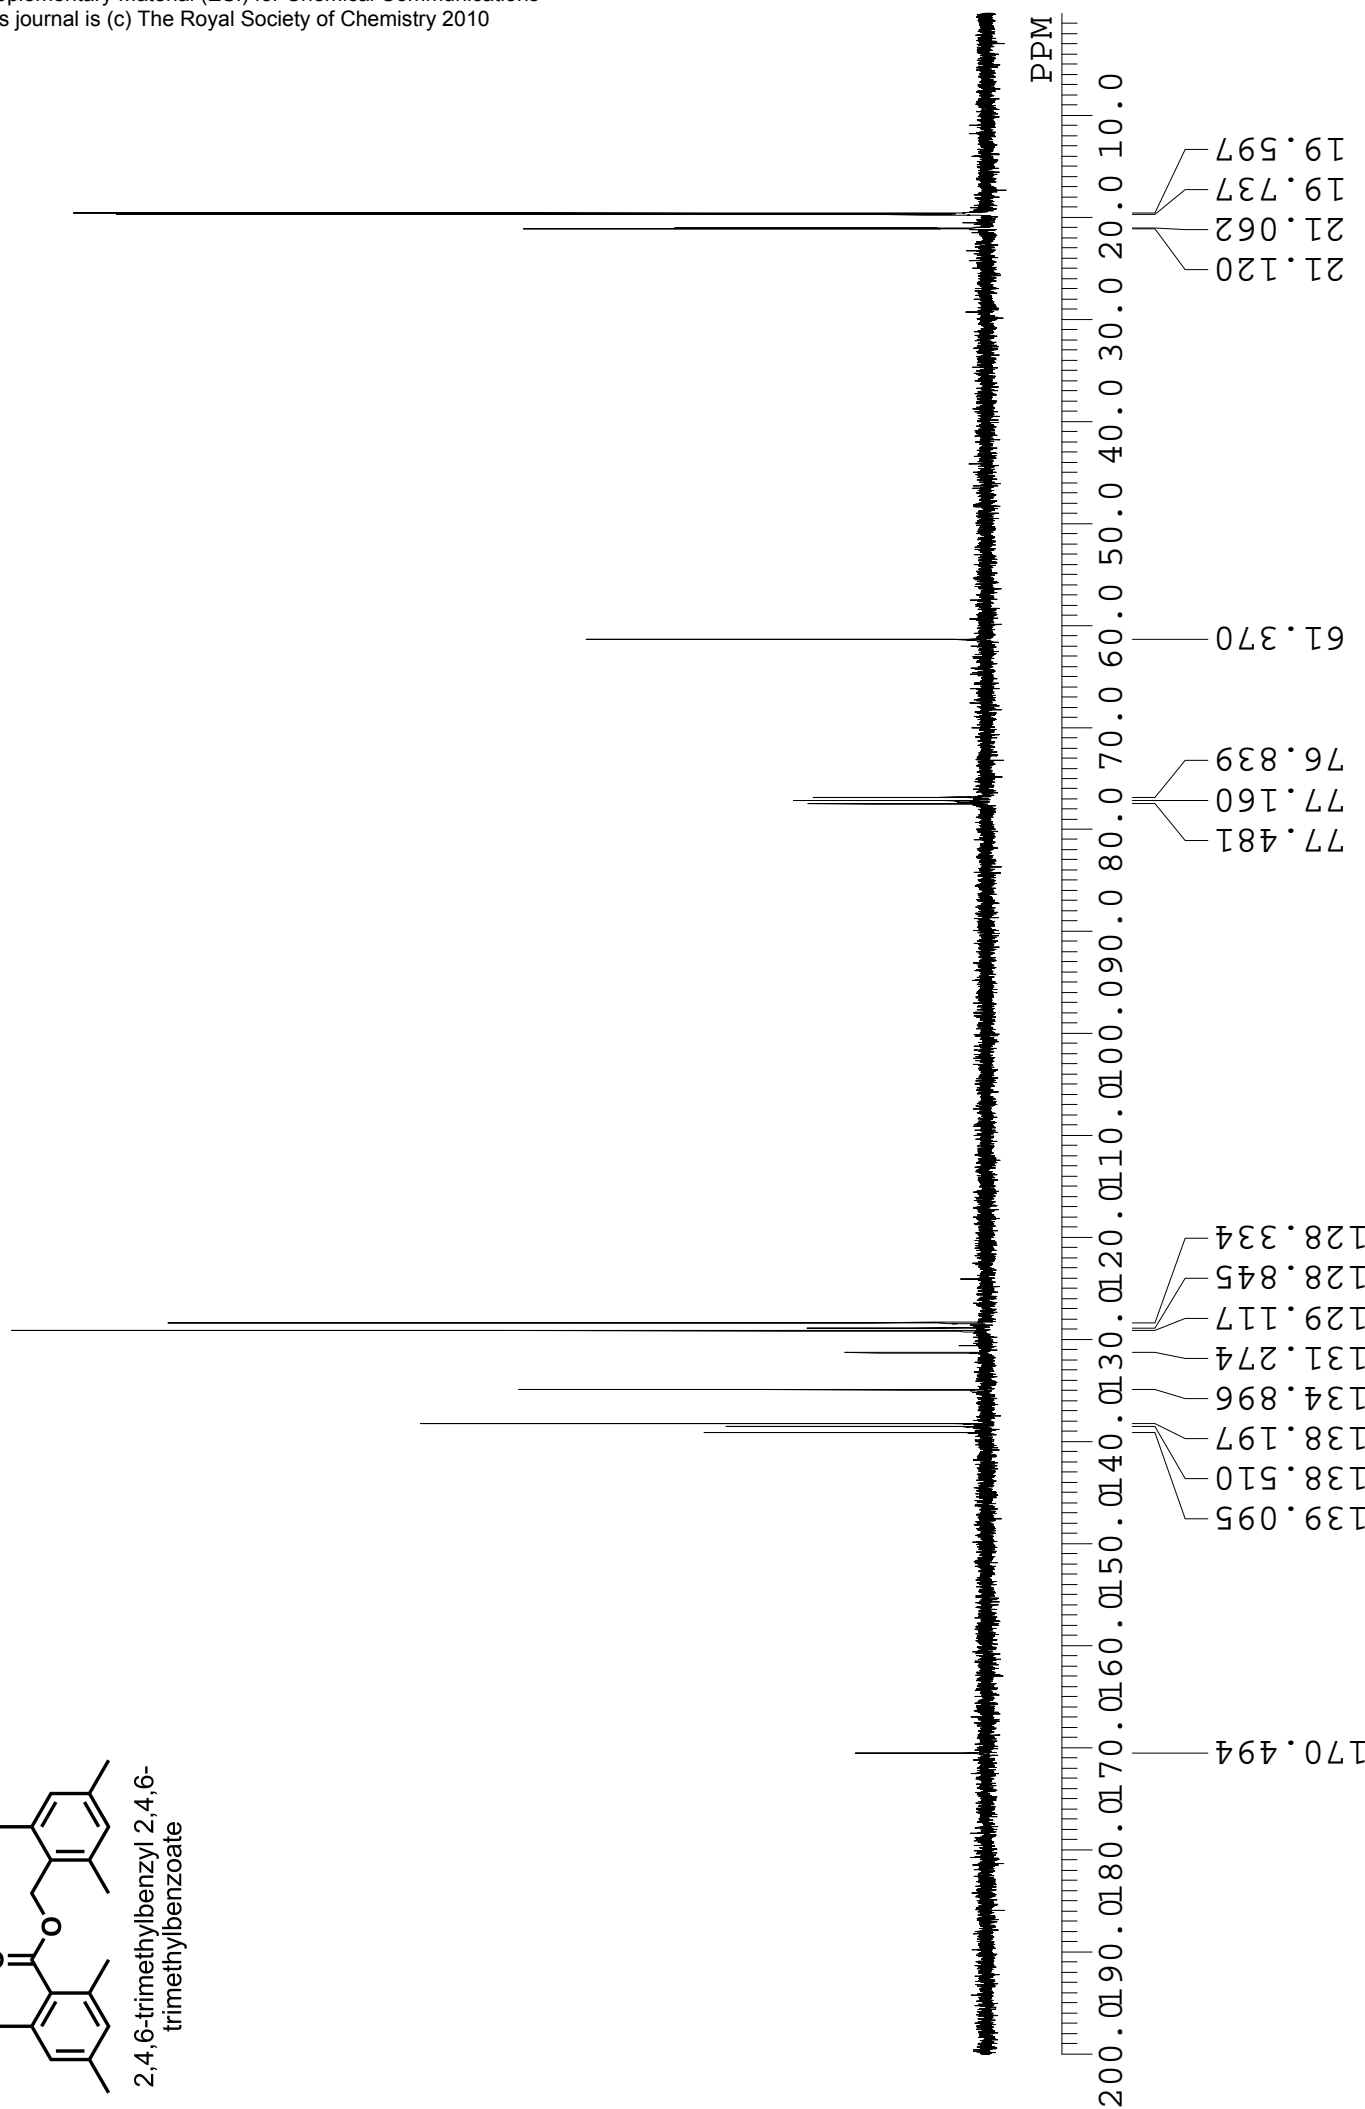

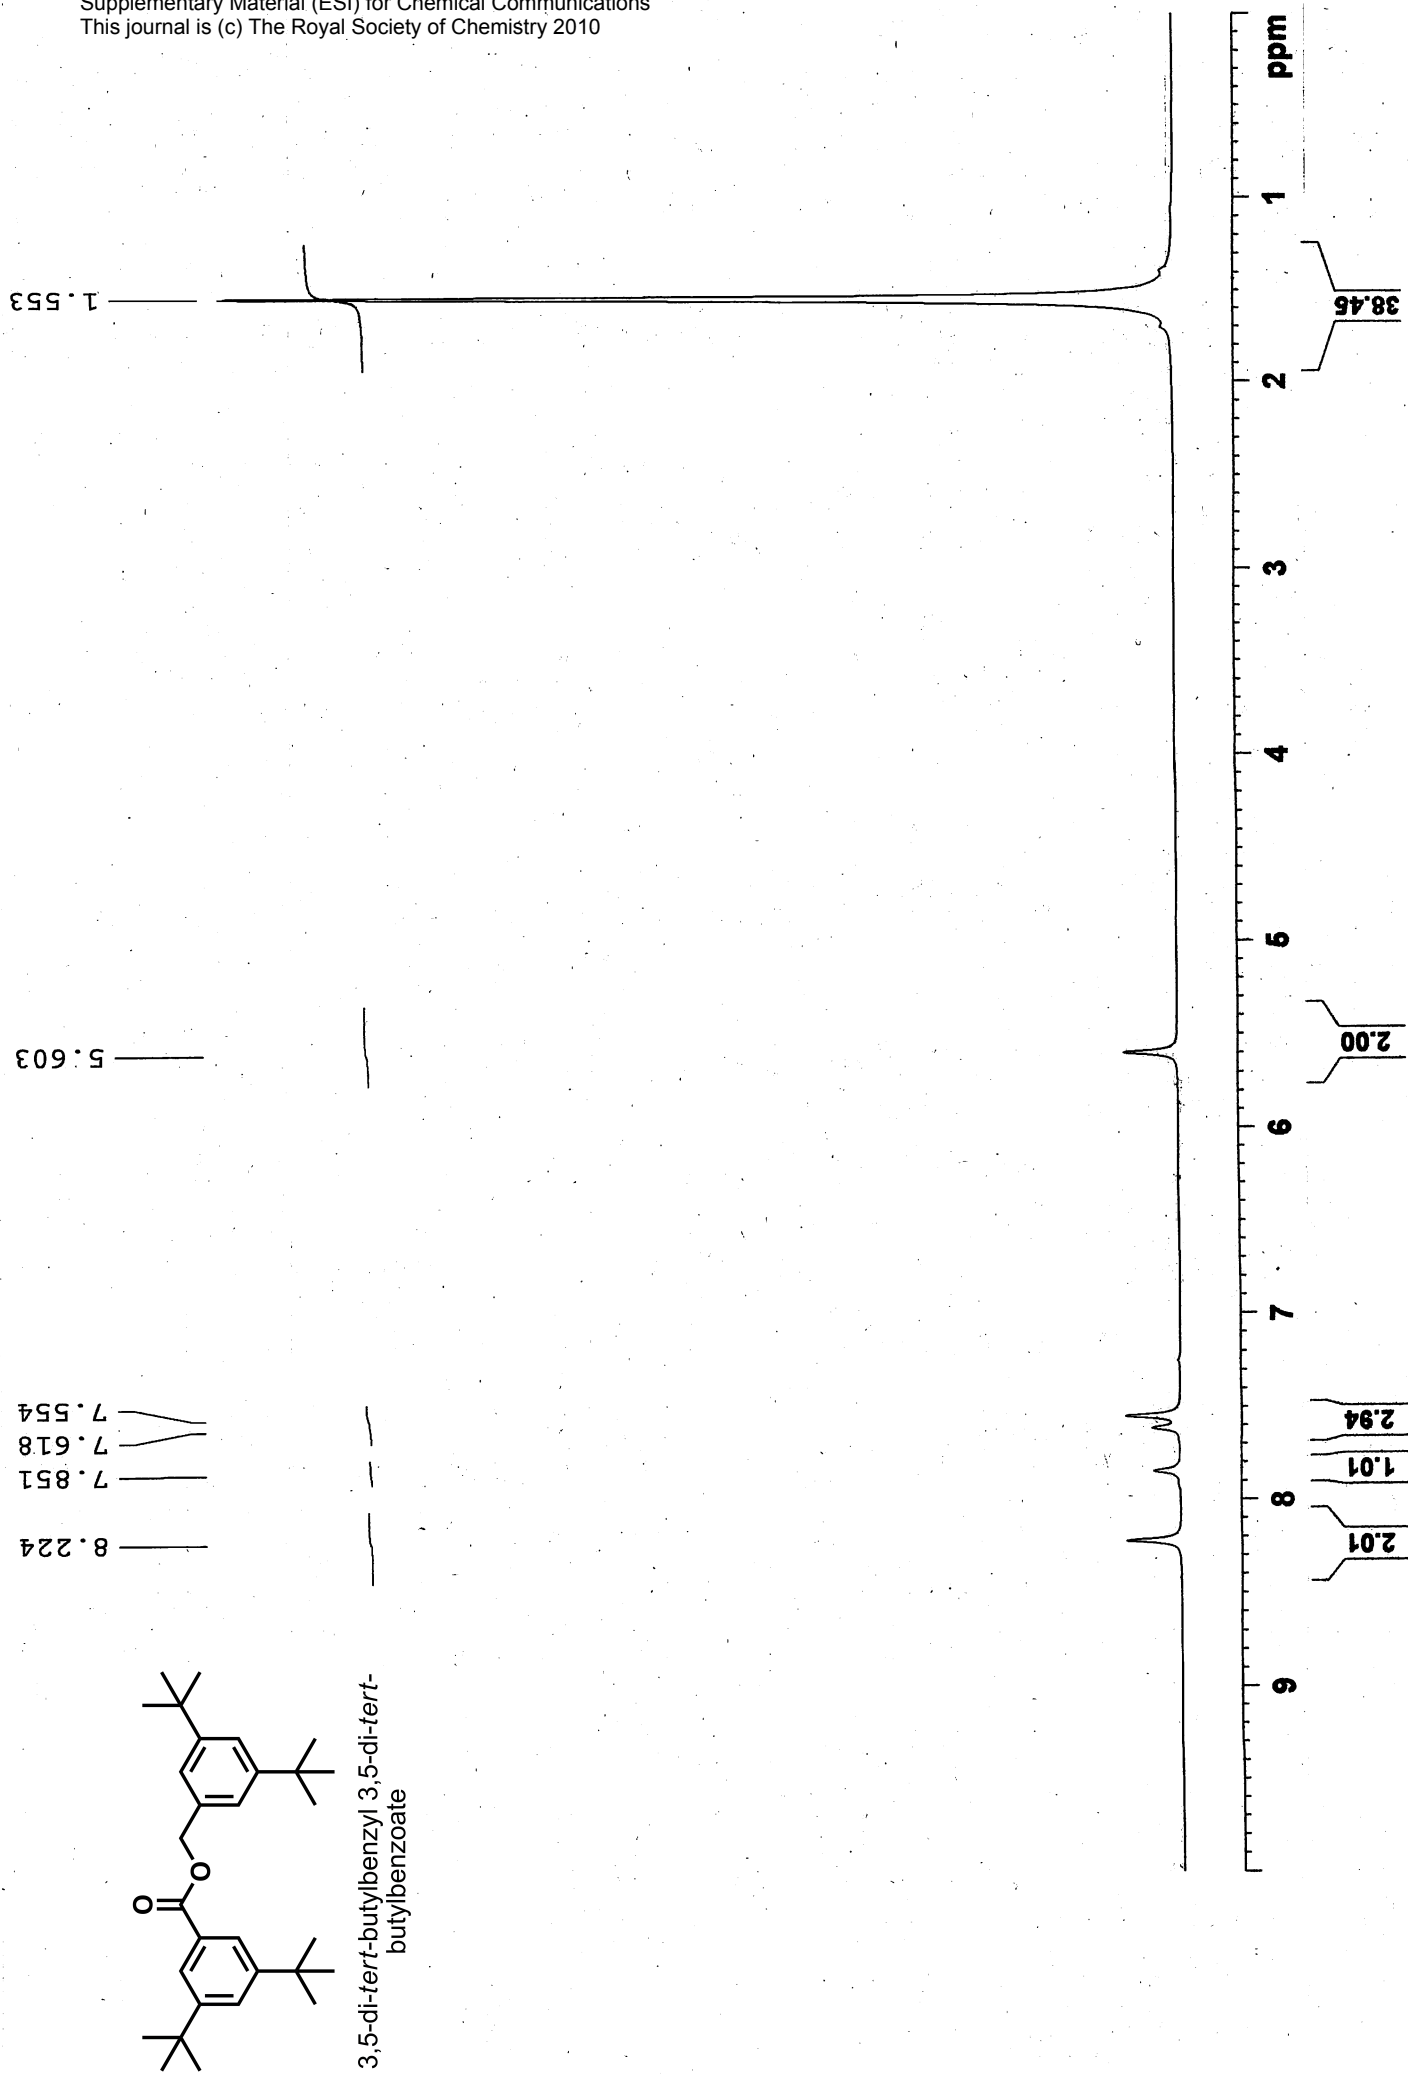

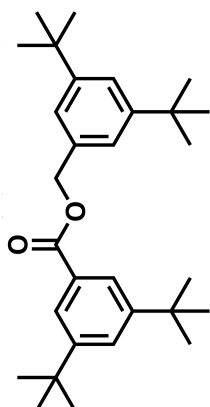

3,5-di-*tert*-butylbenzyl 3,5-di-*tert*-butylbenzoate

34.94  
34.87  
31.55  
31.45

66.95

77.47  
77.15  
76.83

121.89  
121.97  
123.99  
127.06  
129.89

135.65

150.98  
151.00

167.04

ppm  
0  
20  
40  
60  
80  
100  
120  
140  
160  
180  
200  
220

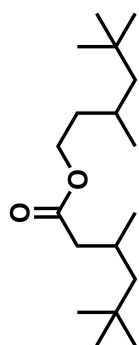

3,5,5-trimethylhexyl 3,5,5-trimethylhexanoate

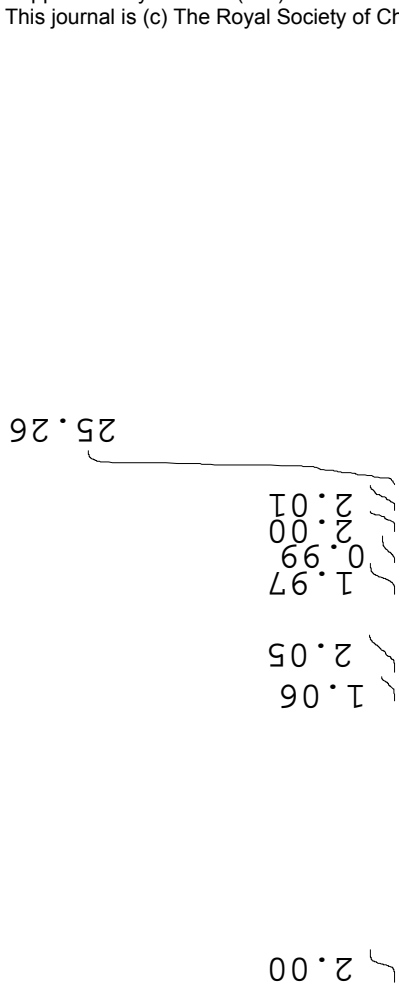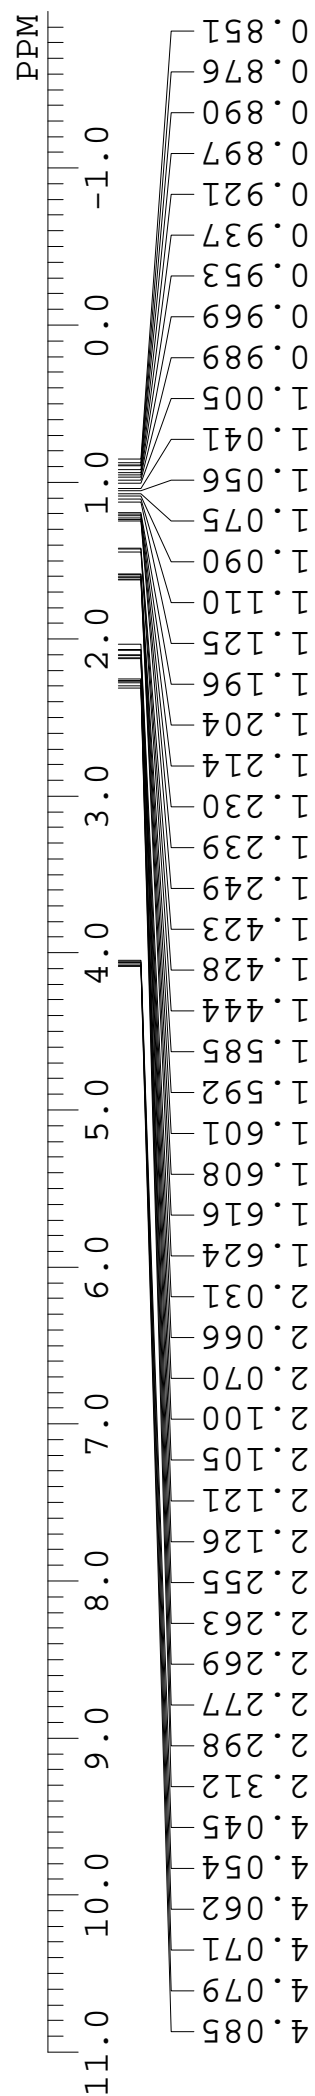

\\HD300G\share\hoshimoto\H-NMR after\R.500-R.599\R.512\R.512 CNMR used sample CDCl3.als

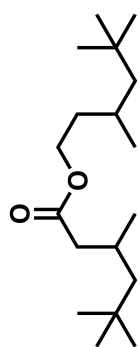

3,5,5-trimethylhexyl 3,5,5-trimethylhexanoate

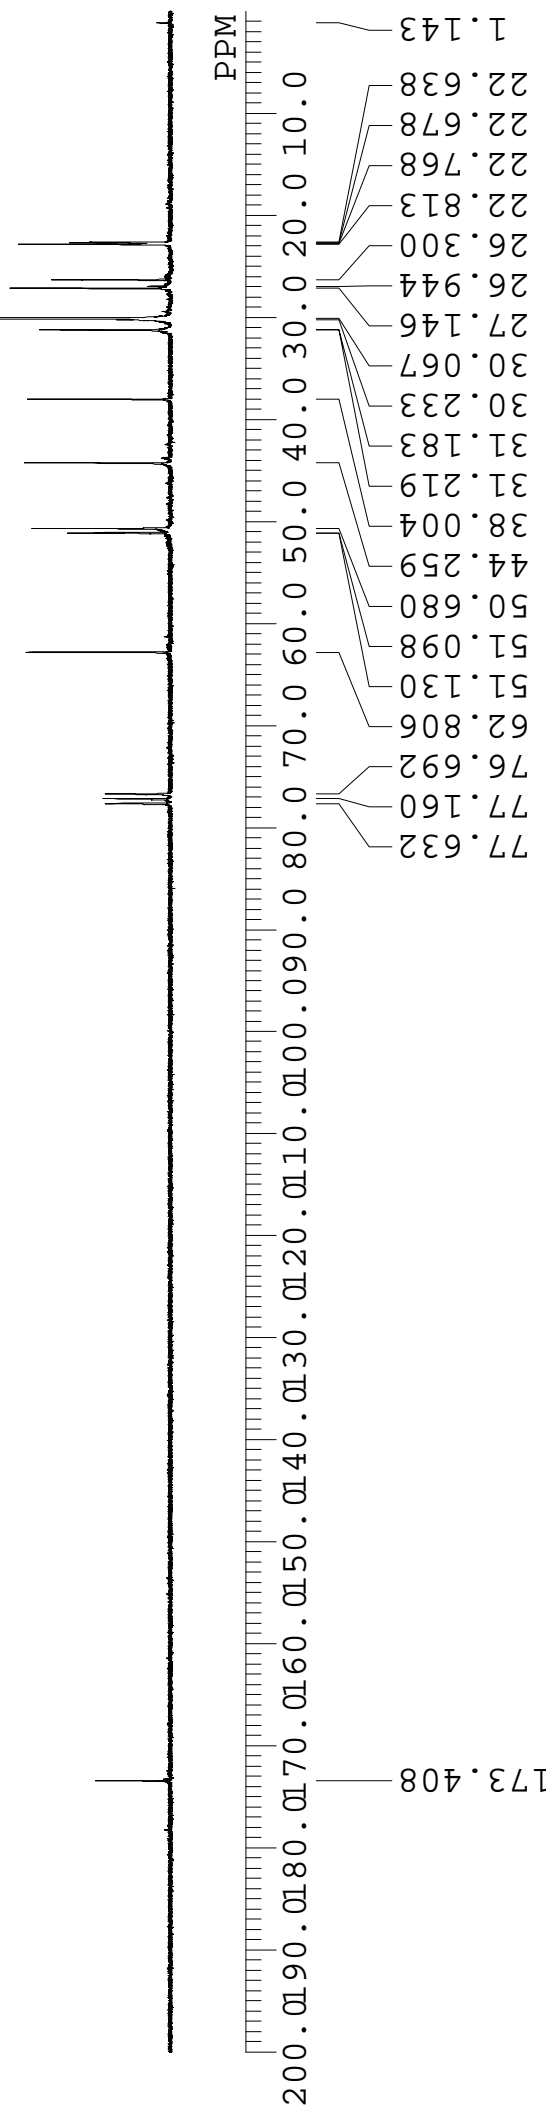

Supplement: b926866a.pdf [file b926866a.pdf]
